# Supplementary material for: Understanding the differences between iron and palladium in cross-coupling reactions
Source: PubMed Central journal article supplement (PMC8610147; doi:10.1039/c8cp07671e), 2019-02-25
Supplement: CP-021-C8CP07671E-s001.pdf [file CP-021-C8CP07671E-s001.pdf]

## Understanding the Differences Between Iron and Palladium in Cross-Coupling Reactions

Xiaobo Sun,<sup>a</sup> Marcus V. J. Rocha,<sup>ab</sup> Trevor A. Hamlin,<sup>a</sup> Jordi Poater,<sup>\*c</sup>  
and F. Matthias Bickelhaupt<sup>\*ad</sup>

<sup>a</sup> Department of Theoretical Chemistry and Amsterdam Center for Multiscale Modeling (ACMM), VU University Amsterdam, De Boelelaan 1083, 1081 HV Amsterdam, The Netherlands. E-mail: f.m.bickelhaupt@vu.nl

<sup>b</sup> Institute of Chemistry – Department of Physical Chemistry, Fluminense Federal University, Outeiro De São João Baptista, 24020-141 Niteroi, Rio de Janeiro, Brazil.

<sup>c</sup> ICREA, Pg. Lluís Companys 23, 08010 Barcelona, Spain and Departament de Química Inorgànica i Orgànica & IQTCUB, Universitat de Barcelona, 08028 Barcelona, Catalonia, Spain. E-mail: jordi.poater@ub.edu

<sup>d</sup> Institute for Molecules and Materials (IMM), Radboud University Nijmegen, Heyendaalseweg 135, 6525 AJ Nijmegen, The Netherlands.

### Contents

**Table S1.** Electronic and, in parentheses, Gibbs free energies relative to reactants for the oxidative insertion of iron model catalysts into H<sub>3</sub>C–X bonds (X = H, Cl, CH<sub>3</sub>), computed at ZORA-OPBE/TZ2P.

**Table S2.** Electronic energy with frozen core (small) and, in parentheses, without frozen core (in kcal mol<sup>-1</sup>) for the oxidative insertion of iron model catalysts into H<sub>3</sub>C–X bonds (X = H, Cl, CH<sub>3</sub>), computed at ZORA-OPBE/TZ2P.

**Table S3.** Electronic energy in gas phase (in kcal mol<sup>-1</sup>) and, in parentheses, in solution (THF) relative to reactants for the oxidative insertion of iron model catalysts into H<sub>3</sub>C–X bonds (X = H, Cl, CH<sub>3</sub>), computed at ZORA-OPBE/TZ2P.

**Table S4.** Electronic energies (in kcal mol<sup>-1</sup>) relative to reactants for the oxidative insertion of <sup>1</sup>Fe(CO)<sub>4</sub> into H<sub>3</sub>C–X bonds (X = H, Cl, CH<sub>3</sub>) in the gas phase, computed at ZORA-OPBE/TZ2P, ZORA-BP86/TZ2P//ZORA-OPBE/TZ2P, ZORA-BLYP/TZ2P//ZORA-OPBE/TZ2P, ZORA-B3LYP/TZ2P//ZORA-OPBE/TZ2P, and ZORA-M06L/TZ2P//ZORA-OPBE/TZ2P.

**Table S5.** Geometry parameters (in Å, degrees) of anionic singlet <sup>1</sup>Fe(CO)<sub>4</sub><sup>-2</sup>, computed at ZORA-OPBE/TZ2P, ZORA-BLYP/TZ2P, ZORA-M06L/TZ2P, and from the literature.

**Table S6.** Geometry parameters (in Å, degrees) of singlet  $^1\text{Fe}(\text{CO})_4$ , computed at ZORA-OPBE/TZ2P, ZORA-BLYP/TZ2P, ZORA-M06L/TZ2P, and from the literature.

**Table S7.** Geometry parameters (in Å, degrees) of triplet  $^3\text{Fe}(\text{CO})_4$ , computed at ZORA-OPBE/TZ2P, ZORA-BLYP/TZ2P, ZORA-M06L/TZ2P, and from the literature.

**Fig. S1** Geometry and electronic energy (in kcal mol<sup>-1</sup>) relative to reactants for the S<sub>N</sub>2 reaction of anionic singlet  $^1\text{Fe}(\text{CO})_4^{2-}$  with H<sub>3</sub>C–X bonds (X = H, Cl, CH<sub>3</sub>), computed at ZORA-OPBE/TZ2P.

**Table S8.** Cartesian coordinates (in Å), ADF total bonding energies (in kcal mol<sup>-1</sup>) and in parentheses, imaginary frequency of transition state structure (in cm<sup>-1</sup>) of all stationary points in this study, computed at ZORA-OPBE/TZ2P.

**Table S1.** Electronic and, in parentheses, Gibbs free energies (in kcal mol<sup>-1</sup>) relative to reactants for the oxidative insertion of iron model catalysts into H<sub>3</sub>C–X bonds (X = H, Cl, CH<sub>3</sub>), computed at ZORA-OPBE/TZ2P.

|                                                |      | RC          | TS          | P             |
|------------------------------------------------|------|-------------|-------------|---------------|
| <sup>1</sup> Fe(CO) <sub>4</sub>               | C–H  | -1.3 (-0.8) | 10.4 (10.3) | 0.8 (2.3)     |
|                                                | C–Cl | -9.0 (-7.2) | 25.5 (27.6) | -15.1 (-11.3) |
|                                                | C–C  | 0.1 (0.2)   | 48.0 (50.3) | 10.2 (12.4)   |
| <sup>3</sup> Fe(CO) <sub>4</sub>               | C–H  | 0 (0.1)     | 64.4 (62.3) | 45.2 (49.0)   |
|                                                | C–Cl | 0 (0.2)     | 43.3 (45.2) | 29.4 (30.8)   |
|                                                | C–C  | -0.1 (-0.4) | 76.9 (75.8) | 51.1 (49.2)   |
| <sup>1</sup> Fe(CO) <sub>4</sub> <sup>-2</sup> | C–H  | -2.4 (-2.3) | 74.1 (69.8) | 66.3 (62.4)   |

**Table S2.** Electronic energy with small frozen core and, in parentheses, electronic energy with no frozen core (in kcal mol<sup>-1</sup>) for the oxidative insertion of iron model catalysts into H<sub>3</sub>C–X bonds (X = H, Cl, CH<sub>3</sub>), computed at ZORA-OPBE/TZ2P.

|                                                |      | <b>RC</b>   | <b>TS</b>   | <b>P</b>      |
|------------------------------------------------|------|-------------|-------------|---------------|
| <sup>1</sup> Fe(CO) <sub>4</sub>               | C–H  | -1.3 (-1.6) | 10.4 (9.9)  | 0.8 (1.4)     |
|                                                | C–Cl | -9.0 (-9.5) | 25.5 (24.9) | -15.1 (-15.8) |
|                                                | C–C  | 0.1 (0.2)   | 48.0 (47.5) | 10.2 (9.8)    |
| <sup>3</sup> Fe(CO) <sub>4</sub>               | C–H  | 0 (0)       | 64.4 (64.6) | 45.2 (46.4)   |
|                                                | C–Cl | 0 (0)       | 43.3 (43.4) | 29.4 (29.6)   |
|                                                | C–C  | -0.1 (0.2)  | 76.9 (76.9) | 51.1 (50.9)   |
| <sup>1</sup> Fe(CO) <sub>4</sub> <sup>-2</sup> | C–H  | -2.4 (-2.1) | 74.1 (73.9) | 66.3 (66.4)   |

**Table S3.** Electronic energy (in kcal mol<sup>-1</sup>) in gas phase and, in parentheses, electronic energy in solution (THF) relative to reactants for the oxidative insertion of iron model catalysts into H<sub>3</sub>C–X bonds (X = H, Cl, CH<sub>3</sub>), computed at ZORA-OPBE/TZ2P.

|                                                |      | RC           | TS          | P             |
|------------------------------------------------|------|--------------|-------------|---------------|
| <sup>1</sup> Fe(CO) <sub>4</sub>               | C–H  | -1.3 (-0.25) | 10.4 (11.2) | 0.8 (3.15)    |
|                                                | C–Cl | -9.0 (-7.8)  | 25.5 (28.1) | -15.1 (-13.8) |
|                                                | C–C  | 0.1 (0.2)    | 48.0 (49.1) | 10.2 (12.3)   |
| <sup>3</sup> Fe(CO) <sub>4</sub>               | C–H  | 0 (1.2)      | 64.4 (64.3) | 45.2 (48.6)   |
|                                                | C–Cl | 0 (0.3)      | 43.3 (43.4) | 29.4 (30.3)   |
|                                                | C–C  | -0.1 (-0.7)  | 76.9 (77.1) | 51.1 (51.3)   |
| <sup>1</sup> Fe(CO) <sub>4</sub> <sup>-2</sup> | C–H  | -2.4 (-1.3)  | 74.1 (81.4) | 66.3 (69.4)   |

**Table S4.** Electronic energies (in kcal mol<sup>-1</sup>) relative to reactants for the oxidative insertion of <sup>1</sup>Fe(CO)<sub>4</sub> into H<sub>3</sub>C–X bonds (X = H, Cl, CH<sub>3</sub>) in the gas phase, computed at ZORA-OPBE/TZ2P, ZORA-BP86/TZ2P//ZORA-OPBE/TZ2P, ZORA-BLYP/TZ2P//ZORA-OPBE/TZ2P, ZORA-B3LYP/TZ2P//ZORA-OPBE/TZ2P, and ZORA-M06L/TZ2P//ZORA-OPBE/TZ2P.

|      | <b>Method</b> <sup>a</sup> | <b>RC</b> | <b>TS</b> | <b>P</b> |
|------|----------------------------|-----------|-----------|----------|
| C–H  | OPBE                       | -1.3      | 10.4      | 0.8      |
|      | BP86                       | -1.8      | 10.9      | 0.4      |
|      | BLYP                       | -1.5      | 14.5      | 3.4      |
|      | B3LYP                      | -2.2      | 14.4      | 2.3      |
|      | M06-L                      | -5.3      | 9.6       | -1.1     |
| C–Cl | OPBE                       | -9.0      | 25.5      | -15.1    |
|      | BP86                       | -10.0     | 20.4      | -20.6    |
|      | BLYP                       | -9.1      | 20.4      | -19.5    |
|      | B3LYP                      | -10.2     | 23.4      | -22.2    |
|      | M06-L                      | -8.2      | 22.8      | -24.3    |
| C–C  | OPBE                       | 0.1       | 48.0      | 10.2     |
|      | BP86                       | -1.1      | 41.7      | 3.2      |
|      | BLYP                       | -0.7      | 47.9      | 9.3      |
|      | B3LYP                      | -1.0      | 50.9      | 9.8      |
|      | M06-L                      | -1.2      | 45.9      | 5.9      |

<sup>a</sup> Indicates the DFT functional used to calculate the energy.

**Table S5.** Geometry parameters (in Å, degrees) of anionic singlet  $^1\text{Fe}(\text{CO})_4^{-2}$ , computed at ZORA-OPBE/TZ2P, ZORA-BLYP/TZ2P, ZORA-M06L/TZ2P, and from the literature.

| Method             | Fe - C | Fe - C | C - O | C - O | $\angle(\text{Fe} - \text{C} - \text{O})$ | $\angle(\text{Fe} - \text{C} - \text{O})$ | $\angle(\text{C} - \text{Fe} - \text{C})$ | $\angle(\text{C} - \text{Fe} - \text{C})$ |
|--------------------|--------|--------|-------|-------|-------------------------------------------|-------------------------------------------|-------------------------------------------|-------------------------------------------|
| OPBE <sup>a</sup>  | 1.727  | 1.727  | 1.200 | 1.200 | 179.8                                     | 179.8                                     | 109.7                                     | 109.7                                     |
| BLYP <sup>a</sup>  | 1.771  | 1.771  | 1.206 | 1.206 | 179.9                                     | 179.9                                     | 109.6                                     | 109.6                                     |
| M06-L <sup>a</sup> | 1.747  | 1.747  | 1.194 | 1.194 | 179.9                                     | 179.9                                     | 109.6                                     | 109.6                                     |
| Exp <sup>b</sup>   | 1.742  | 1.742  | 1.175 | 1.172 | -                                         | -                                         | 109.1                                     | 108.6                                     |
| Exp <sup>c</sup>   | 1.738  | 1.745  | 1.175 | 1.162 | -                                         | -                                         | 109.5                                     | 109.6                                     |

<sup>a</sup> This work: computed using ZORA for relativistic effects and the TZ2P basis set.

<sup>b</sup> R. G. Teller, R. G. Finke, J. P. Collman, H. B. Chin, R. Bau, *J. Am. Chem. Soc.* **1977**, *99*, 1104-1111.

Experimental results from X-ray crystal structures.

<sup>c</sup> H. B. Chin, R. Bau. *J. Am. Chem. Soc.* 1976, *98*, 2434-2439.

Experimental results from X-ray crystal structures.

**Table S6.** Geometry parameters (in Å, degrees) of singlet  $^1\text{Fe}(\text{CO})_4$ , computed at ZORA-OPBE/TZ2P, ZORA-BLYP/TZ2P, ZORA-M06L/TZ2P, and from the literature.

| Method             | Fe–C  | Fe–C  | C–O   | C–O   | <(Fe–C–O) | <(Fe–C–O) | <(C–Fe–C) | <(C–Fe–C) |
|--------------------|-------|-------|-------|-------|-----------|-----------|-----------|-----------|
| OPBE <sup>a</sup>  | 1.777 | 1.732 | 1.151 | 1.158 | 178.2     | 170.5     | 181.7     | 126.6     |
| BLYP <sup>a</sup>  | 1.806 | 1.806 | 1.157 | 1.157 | 170.3     | 170.3     | 141.5     | 141.8     |
| M06-L <sup>a</sup> | 1.808 | 1.773 | 1.144 | 1.149 | 172.1     | 170.5     | 154.4     | 129.6     |
| Exp <sup>b</sup>   | 1.78  | 1.74  | -     | -     | -         | -         | 177.4     | 135.3     |
| BP86 <sup>c</sup>  | 1.803 | 1.770 | 1.153 | 1.153 | -         | -         | 159.8     | 130.2     |
| M06-L <sup>d</sup> | 1.823 | 1.777 | 1.144 | 1.151 | -         | -         | 168.3     | 127.8     |

<sup>a</sup> This work: computed using ZORA for relativistic effects and the TZ2P basis set.

<sup>b</sup> H. Ihee, J. M. Cao, A. H. Zewail, *Angew. Chem. Int. Ed.* **2001**, *40*, 1532-1536.

Experimental results from ultrafast electron diffraction.

<sup>c</sup> A. Krapp, K. K. Pandey, G. Frenking, *J. Am. Chem. Soc.* **2007**, *129*, 7596-7610.

Computational results using ZORA for relativistic effects and the TZ2P basis set.

<sup>d</sup> Z. Sun, H. F. Schaefer III, Y. Xie, Y. Liu, R. Zhong, *J. Comput. Chem.* **2014**, *35*, 998-1009.

Computational results using cc-pVTZ basis set.



**Table S7.** Geometry parameters (in Å, degrees) of triplet  ${}^3\text{Fe}(\text{CO})_4$ , computed at ZORA-OPBE/TZ2P, ZORA-BLYP/TZ2P, ZORA-M06L/TZ2P, and from the literature.

| Method             | Fe - C | Fe - C | C - O | C - O | $\angle(\text{Fe} - \text{C} - \text{O})$ | $\angle(\text{Fe} - \text{C} - \text{O})$ | $\angle(\text{C} - \text{Fe} - \text{C})$ | $\angle(\text{C} - \text{Fe} - \text{C})$ |
|--------------------|--------|--------|-------|-------|-------------------------------------------|-------------------------------------------|-------------------------------------------|-------------------------------------------|
| OPBE <sup>a</sup>  | 1.810  | 1.761  | 1.151 | 1.153 | 175.8                                     | 178.8                                     | 154.5                                     | 96                                        |
| BLYP <sup>a</sup>  | 1.863  | 1.827  | 1.153 | 1.155 | 178.7                                     | 179.5                                     | 146.3                                     | 98.5                                      |
| M06-L <sup>a</sup> | 1.855  | 1.826  | 1.142 | 1.145 | 179.6                                     | 179.9                                     | 144.7                                     | 98.3                                      |
| Exp <sup>b</sup>   | -      | -      | -     | -     | -                                         | -                                         | 145                                       | 120                                       |
| BP86 <sup>c</sup>  | 1.803  | 1.770  | 1.153 | 1.153 | -                                         | -                                         | 159.8                                     | 130.2                                     |
| M06-L <sup>d</sup> | 1.869  | 1.840  | 1.143 | 1.146 | -                                         | -                                         | 146.4                                     | 97.4                                      |

<sup>a</sup> This work: computed using ZORA for relativistic effects and the TZ2P basis set.

<sup>b</sup> H. Ihee, J. M. Cao, A. H. Zewail, *Angew. Chem. Int. Ed.* **2001**, *40*, 1532-1536.

Experimental results from ultrafast electron diffraction.

<sup>c</sup> A. Krapp, K. K. Pandey, G. Frenking, *J. Am. Chem. Soc.* **2007**, *129*, 7596-7610. Computational results using ZORA for relativistic effects and the TZ2P basis set.

<sup>d</sup> Z. Sun, H. F. Schaefer III, Y. Xie, Y. Liu, R. Zhong, *J. Comput. Chem.* **2014**, *35*, 998-1009. Computational results using cc-pVTZ basis set.

**Fig. S1** Geometry and electronic energy (in kcal mol<sup>-1</sup>) relative to reactants for the S<sub>N</sub>2 reaction of anionic singlet <sup>1</sup>Fe(CO)<sub>4</sub><sup>-2</sup> with H<sub>3</sub>C-X bonds (where X = H, Cl, CH<sub>3</sub>), computed at ZORA-OPBE/TZ2P.

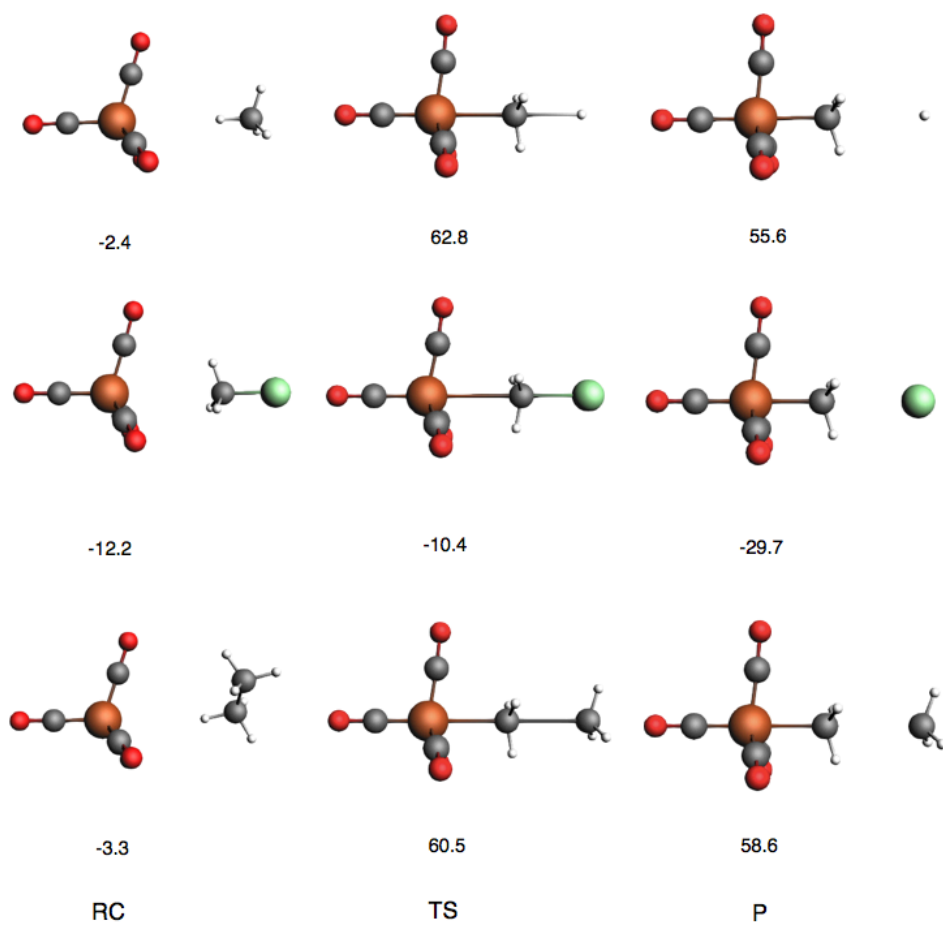

**Table S8.** Cartesian coordinates (in Å), ADF total bonding energies (in kcal mol<sup>-1</sup>) and in parentheses, imaginary frequency of transition state structure (in cm<sup>-1</sup>) of all stationary points in this study, computed at ZORA-OPBE/TZ2P.

|                                                           |             |             |                 |                                                           |             |             |                              |                                                          |             |             |                 |
|-----------------------------------------------------------|-------------|-------------|-----------------|-----------------------------------------------------------|-------------|-------------|------------------------------|----------------------------------------------------------|-------------|-------------|-----------------|
| <b>RC: Pd+CH<sub>4</sub></b>                              |             |             | <b>-557.93</b>  | <b>TS: Pd+CH<sub>4</sub></b>                              |             |             | <b>-548.86</b><br>(-638.52)  | <b>P: Pd+CH<sub>4</sub></b>                              |             |             | <b>-552.12</b>  |
| C                                                         | 0.0000000   | 0.0000000   | -1.93543615     | C                                                         | -1.74196777 | -2.22087997 | 0.00000000                   | C                                                        | -2.10134690 | -2.41901732 | 0.18620613      |
| Pd                                                        | 0.0000000   | 0.0000000   | 0.32205542      | Pd                                                        | -2.13750904 | -0.23784341 | 0.00000000                   | Pd                                                       | -2.73145901 | -0.57025833 | 0.41934115      |
| H                                                         | -0.96181082 | 0.00000000  | -1.33610429     | H                                                         | -2.80956968 | -2.49954731 | 0.00000000                   | H                                                        | -3.88639130 | -1.04648079 | -0.43099501     |
| H                                                         | 0.00000000  | -0.90063254 | -2.55201285     | H                                                         | -1.26528821 | -2.62993236 | 0.89567676                   | H                                                        | -2.78392696 | -3.12497645 | 0.66994616      |
| H                                                         | 0.00000000  | 0.90063254  | -2.55201285     | H                                                         | -1.26528821 | -2.62993236 | -0.89567676                  | H                                                        | -1.97386865 | -2.66955518 | -0.87144525     |
| H                                                         | 0.96181082  | 0.00000000  | -1.33610429     | H                                                         | -0.75509932 | -0.88569836 | 0.00000000                   | H                                                        | -1.12556673 | -2.41201402 | 0.69858365      |
| <b>RC: Pd+CH<sub>3</sub>Cl</b>                            |             |             | <b>-524.16</b>  | <b>TS: Pd+CH<sub>3</sub>Cl</b>                            |             |             | <b>-512.77</b><br>(-194.99)  | <b>P: Pd+CH<sub>3</sub>Cl</b>                            |             |             | <b>-541.55</b>  |
| C                                                         | -1.47287227 | -3.56288223 | 0.26327334      | C                                                         | -2.17528160 | -2.70744274 | 0.04185559                   | C                                                        | -2.24128754 | -2.72324886 | 0.02797073      |
| Pd                                                        | -2.82627779 | -0.34245554 | 0.45624055      | Pd                                                        | -2.81199527 | -0.48996192 | 0.39801798                   | Pd                                                       | -2.21746210 | -0.87254938 | 0.63669530      |
| H                                                         | -1.57461503 | -3.54757927 | -0.82290172     | H                                                         | -3.03828060 | -2.14811751 | -0.44447729                  | Cl                                                       | -0.32812332 | -1.03352457 | 1.74551410      |
| H                                                         | -2.37930991 | -3.94569640 | 0.73456493      | H                                                         | -2.57511176 | -3.48805558 | 0.68792144                   | H                                                        | -1.34236976 | -2.94908132 | -0.55095966     |
| H                                                         | -0.59964137 | -4.14645722 | 0.56552918      | H                                                         | -1.56169511 | -3.12338103 | -0.75763162                  | H                                                        | -3.14585457 | -2.70484419 | -0.60465481     |
| Cl                                                        | -1.20791067 | -1.87762182 | 0.82999800      | Cl                                                        | -0.93457054 | -1.80746229 | 1.11087980                   | H                                                        | -2.35050906 | -3.39492647 | 0.88372619      |
| <b>RC: Pd+C<sub>2</sub>H<sub>6</sub></b>                  |             |             | <b>-936.92</b>  | <b>TS: Pd+C<sub>2</sub>H<sub>6</sub></b>                  |             |             | <b>-913.48</b><br>(-480.74)  | <b>P: Pd+C<sub>2</sub>H<sub>6</sub></b>                  |             |             | <b>-934.44</b>  |
| C                                                         | -0.88946600 | -2.04338800 | -0.17463600     | C                                                         | 0.70009173  | 0.65754447  | -1.57799445                  | C                                                        | 1.44496927  | 0.00000000  | -1.98027211     |
| H                                                         | -2.49303200 | -3.37733700 | 0.43314500      | H                                                         | -0.20436740 | -1.36376803 | -0.91184594                  | H                                                        | -1.40855357 | -0.90094754 | -1.35980537     |
| H                                                         | -1.23793300 | -2.00135900 | -1.25408600     | H                                                         | 1.22041679  | 1.28476466  | -2.36320542                  | H                                                        | 2.35940354  | 0.00000000  | -2.59580903     |
| H                                                         | -0.08816400 | -2.78887200 | -0.15842300     | H                                                         | 1.47760465  | 0.10735848  | -1.04752662                  | H                                                        | 1.40855357  | -0.90094754 | -1.35980537     |
| H                                                         | -0.40987200 | -1.07999400 | 0.18635900      | H                                                         | 0.20436740  | 1.36376803  | -0.91184594                  | H                                                        | 1.40855357  | 0.90094754  | -1.35980537     |
| H                                                         | -1.72154400 | -2.51878800 | 1.77520600      | H                                                         | -1.47760465 | -0.10735848 | -1.04752662                  | H                                                        | -1.40855357 | 0.90094754  | -1.35980537     |
| C                                                         | -2.05029400 | -2.41930700 | 0.73315900      | C                                                         | -0.70009173 | -0.65754447 | -1.57799445                  | C                                                        | -1.44496927 | 0.00000000  | -1.98027211     |
| H                                                         | -2.84402800 | -1.66562800 | 0.70730000      | H                                                         | -1.22041679 | -1.28476466 | -2.36320542                  | H                                                        | -2.35940354 | 0.00000000  | -2.59580903     |
| Pd                                                        | -0.64978700 | -0.18374000 | -1.50171800     | Pd                                                        | 0.00000000  | 0.00000000  | -3.39592210                  | Pd                                                       | 0.00000000  | 0.00000000  | -3.31857216     |
| <b>RC: Pd(CO)<sub>2</sub>+ CH<sub>4</sub></b>             |             |             | <b>-1329.61</b> | <b>TS: Pd(CO)<sub>2</sub>+ CH<sub>4</sub></b>             |             |             | <b>-1296.17</b><br>(-542.12) | <b>P: Pd(CO)<sub>2</sub>+ CH<sub>4</sub></b>             |             |             | <b>-1297.91</b> |
| Pd                                                        | -0.06414951 | -2.44190500 | 1.79987105      | Pd                                                        | 0.29344087  | -3.40955739 | 1.17923774                   | Pd                                                       | 0.02532863  | -2.30155893 | 1.95129640      |
| H                                                         | 2.50988985  | -7.35497188 | -0.25450190     | H                                                         | -1.61529078 | -3.27886712 | -0.58090923                  | C                                                        | 1.56954094  | -1.72674987 | 2.94150840      |
| H                                                         | 0.94140707  | -6.51790215 | -0.09782246     | H                                                         | 0.35365903  | -4.68173609 | 0.27044156                   | C                                                        | -1.41905751 | -1.06129709 | 2.41841636      |
| C                                                         | -1.85275106 | -1.81378783 | 1.62990427      | C                                                         | -0.49795146 | -1.83188013 | 2.07464044                   | O                                                        | 2.55914852  | -1.50099073 | 3.47022442      |
| C                                                         | 1.94529528  | -6.45940250 | -0.52651035     | C                                                         | -1.35176932 | -4.13143809 | 0.05415290                   | O                                                        | -2.29199261 | -0.36623478 | 2.66362953      |
| H                                                         | 1.87202436  | -6.39201982 | -1.61454559     | H                                                         | -1.30483947 | -5.02385777 | -0.57157505                  | H                                                        | 0.96480554  | -3.43413170 | 1.39982931      |
| C                                                         | 1.58542910  | -2.11550416 | 2.69199056      | C                                                         | 2.12156276  | -3.51852731 | 1.78019728                   | C                                                        | -1.23322298 | -3.37235891 | 0.68304309      |
| H                                                         | 2.45913377  | -5.57308254 | -0.14137475     | H                                                         | -2.12722996 | -4.28315103 | 0.81257110                   | H                                                        | -0.76158454 | -4.22944304 | 0.20427162      |
| O                                                         | -2.87858188 | -1.29892266 | 1.65930362      | O                                                         | -0.93770215 | -0.92497230 | 2.61691378                   | H                                                        | -1.59080701 | -2.68049396 | -0.08811253     |
| O                                                         | 2.48393881  | -1.76824590 | 3.31675104      | O                                                         | 3.21453376  | -3.67518078 | 2.08730242                   | H                                                        | -2.08788925 | -3.71655134 | 1.27651445      |
| <b>RC: Pd(CO)<sub>2</sub>+ CH<sub>3</sub>Cl</b>           |             |             | <b>-1292.30</b> | <b>TS: Pd(CO)<sub>2</sub>+ CH<sub>3</sub>Cl</b>           |             |             | <b>-1257.35</b><br>(-287.64) | <b>P: Pd(CO)<sub>2</sub>+ CH<sub>3</sub>Cl</b>           |             |             | <b>-1287.03</b> |
| Pd                                                        | 0.20762769  | -2.17082175 | 3.45685133      | Pd                                                        | 0.09340518  | -3.40057459 | 1.33616957                   | Pd                                                       | -0.06557000 | -2.36175000 | 1.97496900      |
| H                                                         | -1.96339015 | 1.00868608  | 1.78909139      | O                                                         | -2.47799499 | -3.82055043 | -0.34278022                  | C                                                        | 1.47139900  | -1.93311300 | 3.28758400      |
| H                                                         | -2.87381105 | 1.82609219  | 0.48089263      | O                                                         | 0.67086432  | -1.18500901 | 3.42582258                   | C                                                        | -1.01001800 | -0.69873700 | 1.90206300      |
| C                                                         | -1.25531376 | -3.27950337 | 2.94676826      | C                                                         | -1.52373170 | -3.71131258 | 0.28594105                   | O                                                        | 2.35767200  | -1.81288700 | 3.99473200      |
| C                                                         | -2.51130688 | 1.91041479  | 1.50779981      | C                                                         | 0.47886335  | -2.04302150 | 2.68773539                   | O                                                        | -1.59562000 | 0.28656400  | 1.83970400      |
| H                                                         | -1.87020167 | 2.78876919  | 1.61002360      | Cl                                                        | 1.79684075  | -4.98498591 | 1.01151774                   | Cl                                                       | 0.90205200  | -4.50890400 | 1.88015000      |
| C                                                         | 1.42952685  | -0.86482051 | 2.80934747      | C                                                         | 1.65123748  | -3.06102446 | -0.20645330                  | C                                                        | -1.51668900 | -3.09251400 | 0.60904700      |
| Cl                                                        | -3.90095569 | 2.09114745  | 2.58784157      | H                                                         | 2.65656415  | -2.82493719 | 0.12690288                   | H                                                        | -0.92324900 | -3.41743600 | -0.24956100     |
| O                                                         | -2.11244291 | -3.86990338 | 2.46292836      | H                                                         | 1.00886289  | -2.16895922 | -0.27920806                  | H                                                        | -2.27125900 | -2.35535900 | 0.32396600      |
| O                                                         | 2.07066594  | -0.09551138 | 2.24721489      | H                                                         | 1.61701657  | -3.67501512 | -1.10052938                  | H                                                        | -1.95968700 | -3.94371400 | 1.13269400      |
| <b>RC: Pd(CO)<sub>2</sub>+ C<sub>2</sub>H<sub>6</sub></b> |             |             | <b>-1709.10</b> | <b>TS: Pd(CO)<sub>2</sub>+ C<sub>2</sub>H<sub>6</sub></b> |             |             | <b>-1655.09</b><br>(-452.83) | <b>P: Pd(CO)<sub>2</sub>+ C<sub>2</sub>H<sub>6</sub></b> |             |             | <b>-1676.17</b> |
| Pd                                                        | -0.57878086 | -2.82371036 | 1.31950782      | Pd                                                        | 0.07341342  | -3.28415047 | 1.22376583                   | Pd                                                       | 0.11506207  | -3.22483377 | 1.18544393      |
| O                                                         | -3.05617499 | -3.63780186 | -0.24253754     | O                                                         | -2.65800856 | -3.41021992 | -0.18534767                  | O                                                        | -2.70867942 | -3.66055704 | 0.06241640      |
| O                                                         | 0.12855578  | -0.50430888 | 3.15302006      | O                                                         | -0.14008205 | -0.93411461 | 3.20988952                   | O                                                        | -0.17841338 | -0.84934519 | 3.10760237      |
| C                                                         | -2.06469166 | -3.43560307 | 0.30034990      | C                                                         | -1.68988159 | -3.54957793 | 0.91954986                   | C                                                        | -1.66875111 | -3.46473053 | 0.49665295      |
| C                                                         | -0.02035174 | -1.42367619 | 2.48135918      | C                                                         | 0.04189081  | -1.72793607 | 2.39837514                   | C                                                        | -0.11144807 | -1.73352519 | 2.38497870      |
| H                                                         | 4.81671409  | -7.24622468 | 1.36478756      | H                                                         | 1.97792841  | -5.52541075 | 1.45458490                   | C                                                        | 2.12915259  | -3.22598774 | 1.73243590      |
| C                                                         | 3.37849241  | -5.78123859 | 0.64709165      | C                                                         | 2.13831009  | -3.46725921 | 0.63355276                   | C                                                        | 0.68991604  | -4.83729516 | -0.00703551     |
| H                                                         | 3.56083128  | -5.06099426 | 1.45334440      | H                                                         | 2.81723182  | -3.38898705 | 1.48317521                   | H                                                        | 2.67310990  | -2.71490586 | 0.92996631      |
| H                                                         | 2.49734990  | -6.36592884 | 0.92701118      | H                                                         | 1.96516206  | -2.47130769 | 0.19046166                   | H                                                        | 2.48113566  | -4.25733028 | 1.80647597      |
| C                                                         | 3.13041336  | -5.20889843 | -0.25457171     | H                                                         | 2.56395305  | -4.09921054 | -0.14447344                  | H                                                        | 2.32321673  | -2.70980285 | 2.67681289      |
| C                                                         | 4.58434996  | -6.68428184 | 0.45279307      | C                                                         | 1.03265356  | -5.19942006 | 1.02311526                   | H                                                        | 1.69359164  | -4.65841346 | -0.39870130     |
| H                                                         | 4.41443297  | -7.41413060 | -0.34726515     | H                                                         | 0.22903779  | -5.51731315 | 1.71148837                   | H                                                        | 0.00535001  | -5.02513655 | -0.83899231     |
| H                                                         | 5.47819385  | -6.10842777 | 0.18615746      | H                                                         | 0.88185066  | -5.64382216 | 0.03894981                   | H                                                        | 0.70756156  | -5.71842681 | 0.64459109      |

|                                                                                                                                                                                                                                                                                                                                                                                                                                                                                                                                                                           |                                                                                                                                                                                                                                                                                                                                                                                                                                                                                                                                                                        |                                                                                                                                                                                                                                                                                                                                                                                                                                                                                                                                                                        |
|---------------------------------------------------------------------------------------------------------------------------------------------------------------------------------------------------------------------------------------------------------------------------------------------------------------------------------------------------------------------------------------------------------------------------------------------------------------------------------------------------------------------------------------------------------------------------|------------------------------------------------------------------------------------------------------------------------------------------------------------------------------------------------------------------------------------------------------------------------------------------------------------------------------------------------------------------------------------------------------------------------------------------------------------------------------------------------------------------------------------------------------------------------|------------------------------------------------------------------------------------------------------------------------------------------------------------------------------------------------------------------------------------------------------------------------------------------------------------------------------------------------------------------------------------------------------------------------------------------------------------------------------------------------------------------------------------------------------------------------|
| <b>RC: Pd(PH<sub>3</sub>)<sub>2</sub>+ CH<sub>4</sub></b><br>-1339.52                                                                                                                                                                                                                                                                                                                                                                                                                                                                                                     | <b>TS: Pd(PH<sub>3</sub>)<sub>2</sub>+ CH<sub>4</sub></b><br>-1308.79<br>(-587.74)                                                                                                                                                                                                                                                                                                                                                                                                                                                                                     | <b>P: Pd(PH<sub>3</sub>)<sub>2</sub>+ CH<sub>4</sub></b><br>-1311.18                                                                                                                                                                                                                                                                                                                                                                                                                                                                                                   |
| Pd 0.04601830 -2.17968359 1.98078367<br>H 3.04935852 -1.34955766 2.90448089<br>H -2.25553764 -2.82680773 -0.13477425<br>P -2.03178194 -2.35516281 1.18972535<br>H -2.98230774 -3.22812389 1.79285356<br>H -2.93808350 -1.25937367 1.07843852<br>P 2.20359375 -2.42092099 2.49040646<br>H 2.62874432 -3.30612896 3.52252855<br>H 3.11567765 -2.92003506 1.51784092<br>C -0.17876482 -7.63492444 0.86100690<br>H -0.96466219 -8.03168755 1.50879408<br>H -0.46352749 -7.77611312 -0.18482110<br>H -0.04343704 -6.56937885 1.06222047<br>H 0.75633303 -8.16557151 1.05757931 | Pd 0.14041712 -2.99250931 1.74548279<br>H 2.34356608 -1.95764203 3.82935674<br>H -2.95603752 -2.02833049 0.97709791<br>P -1.69462983 -1.59697923 1.48815767<br>H -2.25560925 -0.90947861 2.60391396<br>H -1.63163215 -0.43534195 0.66414927<br>P 1.74789922 -1.63669753 2.57652182<br>H 2.98646166 -1.51906151 1.88391945<br>H 1.65009088 -0.23945252 2.85905753<br>C -0.55760979 -4.88285714 1.08981960<br>H 0.03561137 -5.80026809 1.08459367<br>H -0.87785051 -4.68275084 0.06071308<br>H -1.43364795 -5.05225318 1.72660068<br>H 0.99341583 -4.30166428 1.71775803 | Pd 0.15847936 -2.33035879 1.57912196<br>H 1.52238550 0.24518024 3.15660713<br>H -2.21628662 -0.73479864 0.10615410<br>P -1.68592078 -0.99178859 1.40052549<br>H -2.90946495 -1.44552465 1.96647672<br>H -1.80601672 0.34991450 1.86903830<br>P 1.68478871 -1.09180346 2.68082581<br>H 2.22278754 -1.59940069 3.89482808<br>H 2.94002138 -0.85785127 2.05611669<br>H 1.28582037 -3.43474265 1.57241926<br>C -0.79769670 -3.87753728 0.56085952<br>H -0.25263271 -4.08239478 -0.36675903<br>H -1.83769914 -3.63832494 0.30955190<br>H -0.78732127 -4.78478333 1.17328578 |

|                                                                                                                                                                                                                                                                                                                                                                                                                                                                                                                                                                          |                                                                                                                                                                                                                                                                                                                                                                                                                                                                                                                                                                         |                                                                                                                                                                                                                                                                                                                                                                                                                                                                                                                                                                          |
|--------------------------------------------------------------------------------------------------------------------------------------------------------------------------------------------------------------------------------------------------------------------------------------------------------------------------------------------------------------------------------------------------------------------------------------------------------------------------------------------------------------------------------------------------------------------------|-------------------------------------------------------------------------------------------------------------------------------------------------------------------------------------------------------------------------------------------------------------------------------------------------------------------------------------------------------------------------------------------------------------------------------------------------------------------------------------------------------------------------------------------------------------------------|--------------------------------------------------------------------------------------------------------------------------------------------------------------------------------------------------------------------------------------------------------------------------------------------------------------------------------------------------------------------------------------------------------------------------------------------------------------------------------------------------------------------------------------------------------------------------|
| <b>RC: Pd(PH<sub>3</sub>)<sub>2</sub>+ CH<sub>3</sub>Cl</b><br>-1302.27                                                                                                                                                                                                                                                                                                                                                                                                                                                                                                  | <b>TS: Pd(PH<sub>3</sub>)<sub>2</sub>+ CH<sub>3</sub>Cl</b><br>-1271.14<br>(-364.82)                                                                                                                                                                                                                                                                                                                                                                                                                                                                                    | <b>P: Pd(PH<sub>3</sub>)<sub>2</sub>+ CH<sub>3</sub>Cl</b><br>-1309.76                                                                                                                                                                                                                                                                                                                                                                                                                                                                                                   |
| C 3.39463592 1.62145001 0.25637816<br>Cl 3.83065213 3.21367138 -0.38198811<br>Pd -1.22822534 -0.61556209 0.05606666<br>H 2.30723846 1.52388909 0.24990551<br>H 3.84554256 0.85449122 -0.37726890<br>H 3.77544516 1.53732085 1.27661011<br>P -0.80206013 -0.47017285 -2.12927737<br>P -1.77580393 -0.29893513 2.19519817<br>H -1.57511035 0.97040364 2.80777217<br>H -1.81923691 -0.70632779 -3.09838547<br>H -3.12112424 -0.44009661 2.64177744<br>H -1.21727002 -1.04130417 3.27220280<br>H -0.37498258 0.76382895 -2.69636949<br>H 0.18094802 -1.25499649 -2.801114727 | Pd 0.08805989 -2.99629170 1.85901762<br>H 2.73257805 -2.30878568 3.81988686<br>H -1.41598657 -0.32043439 0.66326354<br>P -1.62285286 -1.68040974 1.03918255<br>H -2.40654213 -1.97818175 -0.11760734<br>H -2.75312452 -1.37871435 1.85548273<br>P 1.66955674 -1.80766544 3.00189027<br>H 2.52856524 -0.97832415 2.22364005<br>H 1.34404767 -0.76813692 3.92413852<br>C 0.29666168 -5.06236222 2.69171151<br>H 1.32784901 -5.31868036 2.92069548<br>H -0.34529285 -5.93212602 2.58137260<br>H -0.15364876 -4.37100803 3.43909941<br>Cl 0.38553501 -4.94900827 0.55955361 | Pd -0.04902266 -2.39283936 1.69211277<br>H 1.70817573 0.14576356 2.99410678<br>H -1.62357836 -0.69640822 -0.39334794<br>P -1.39146549 -0.83001254 1.00069659<br>H -2.75052381 -0.86589242 1.40877646<br>H -1.15911321 0.54718105 1.27489373<br>P 1.62165107 -1.26881885 2.81917210<br>H 1.82767774 -1.62382693 4.17488513<br>H 2.94646029 -1.46806442 2.35930493<br>Cl 1.23245250 -4.23769250 2.31985006<br>C -1.40586688 -3.64033214 0.74846575<br>H -0.79867758 -4.20631115 0.03629264<br>H -2.25875991 -3.18927123 0.22853059<br>H -1.76663589 -4.29792989 1.54472788 |

|                                                                                                                                                                                                                                                                                                                                                                                                                                                                                                                                                                                                                                                                                               |                                                                                                                                                                                                                                                                                                                                                                                                                                                                                                                                                                                                                                                                                                |                                                                                                                                                                                                                                                                                                                                                                                                                                                                                                                                                                                                                                                                                              |
|-----------------------------------------------------------------------------------------------------------------------------------------------------------------------------------------------------------------------------------------------------------------------------------------------------------------------------------------------------------------------------------------------------------------------------------------------------------------------------------------------------------------------------------------------------------------------------------------------------------------------------------------------------------------------------------------------|------------------------------------------------------------------------------------------------------------------------------------------------------------------------------------------------------------------------------------------------------------------------------------------------------------------------------------------------------------------------------------------------------------------------------------------------------------------------------------------------------------------------------------------------------------------------------------------------------------------------------------------------------------------------------------------------|----------------------------------------------------------------------------------------------------------------------------------------------------------------------------------------------------------------------------------------------------------------------------------------------------------------------------------------------------------------------------------------------------------------------------------------------------------------------------------------------------------------------------------------------------------------------------------------------------------------------------------------------------------------------------------------------|
| <b>RC: Pd(PH<sub>3</sub>)<sub>2</sub>+ C<sub>2</sub>H<sub>6</sub></b><br>-1718.93                                                                                                                                                                                                                                                                                                                                                                                                                                                                                                                                                                                                             | <b>TS: Pd(PH<sub>3</sub>)<sub>2</sub>+ C<sub>2</sub>H<sub>6</sub></b><br>-1666.99<br>(-446.72)                                                                                                                                                                                                                                                                                                                                                                                                                                                                                                                                                                                                 | <b>P: Pd(PH<sub>3</sub>)<sub>2</sub>+ C<sub>2</sub>H<sub>6</sub></b><br>-1688.89                                                                                                                                                                                                                                                                                                                                                                                                                                                                                                                                                                                                             |
| Pd 0.00000000 0.00000000 -1.15018261<br>C -0.23797370 0.72135286 4.29930754<br>C 0.23797370 -0.72135286 4.29930754<br>H 0.111749259 1.26007901 3.41346394<br>H -1.33268182 0.78228736 4.30239499<br>H 0.12215960 1.26396554 5.18128127<br>H -0.11749259 -1.26007901 3.41346394<br>H 1.33268182 -0.78228736 4.30239499<br>H -0.12215960 -1.26396554 5.18128127<br>P -1.82347349 1.25832773 -0.89583284<br>P 1.82347349 -1.25832773 -0.89583284<br>H 1.76777675 -2.47707469 -0.16119136<br>H -2.57631227 1.80916731 -1.97502850<br>H 2.57631227 -1.80916731 -1.97502850<br>H 2.96309159 -0.75206817 -0.20801902<br>H -2.96309159 0.75206817 -0.20801902<br>H -1.76777675 2.47707469 -0.16119136 | Pd 0.00513108 -2.97517596 1.76589892<br>H 2.16587900 -0.45395078 1.52675469<br>H -1.93854727 -0.62402673 0.74366435<br>P -1.72998976 -1.46468249 1.87707474<br>H -3.12179517 -1.76918203 2.02272969<br>H -1.79627345 -0.37752686 2.80176662<br>P 1.93308592 -1.75371163 2.07253628<br>H 2.23087358 -1.33996676 3.40487355<br>H 3.27322119 -2.18454535 1.80876910<br>H -0.82948679 -4.88514642 2.22901358<br>C 0.57829346 -4.76630417 0.75493440<br>H 0.87313622 -4.03435265 -0.02278811<br>H -0.03860530 -5.51785644 0.26043317<br>H 1.46723746 -5.23219913 1.18418867<br>H -0.33259305 -5.82528190 2.47233963<br>H -1.76544676 -5.07974156 1.70226832<br>H -1.03573801 -4.37624316 3.19107997 | Pd 0.02031695 -2.52480198 1.96738709<br>H 1.56518650 -0.20191873 3.74153899<br>H -2.39458930 -0.66166249 1.00256823<br>P -1.67423405 -1.04319883 2.16770896<br>H -2.81766978 -1.42062926 2.92548554<br>H -1.57761919 0.27231846 2.71146912<br>P 1.68516945 -1.44035091 3.04323853<br>H 2.38701138 -2.11793001 4.07789442<br>H 2.84276619 -1.06979555 2.30397087<br>C 1.37305133 -4.08373651 1.65599777<br>C -1.30271708 -3.74139899 0.90641420<br>H -1.07688281 -3.60996414 -0.15878806<br>H -2.36259560 -3.50739885 1.06745082<br>H -1.13597553 -4.78750521 1.17829400<br>H 1.24625538 -4.47668890 0.64311351<br>H 1.12787572 -4.87257536 2.37722479<br>H 2.42640396 -3.80700786 1.78983268 |

|                                                                                                                                                                                                                                                                                                                                                                                                                                                                                                                                                                                                                                                                                                                                                                                                                                  |                                                                                                                                                                                                                                                                                                                                                                                                                                                                                                                                                                                                                                                                                                                                                                                                                                  |                                                                                                                                                                                                                                                                                                                                                                                                                                                                                                                                                                                                                                                                                                                                                                                                                 |
|----------------------------------------------------------------------------------------------------------------------------------------------------------------------------------------------------------------------------------------------------------------------------------------------------------------------------------------------------------------------------------------------------------------------------------------------------------------------------------------------------------------------------------------------------------------------------------------------------------------------------------------------------------------------------------------------------------------------------------------------------------------------------------------------------------------------------------|----------------------------------------------------------------------------------------------------------------------------------------------------------------------------------------------------------------------------------------------------------------------------------------------------------------------------------------------------------------------------------------------------------------------------------------------------------------------------------------------------------------------------------------------------------------------------------------------------------------------------------------------------------------------------------------------------------------------------------------------------------------------------------------------------------------------------------|-----------------------------------------------------------------------------------------------------------------------------------------------------------------------------------------------------------------------------------------------------------------------------------------------------------------------------------------------------------------------------------------------------------------------------------------------------------------------------------------------------------------------------------------------------------------------------------------------------------------------------------------------------------------------------------------------------------------------------------------------------------------------------------------------------------------|
| <b>RC: Pd(PH<sub>3</sub>)<sub>2</sub>CH<sub>3</sub>Cl +<br/>MgCH<sub>3</sub>Cl</b><br>-1890.91                                                                                                                                                                                                                                                                                                                                                                                                                                                                                                                                                                                                                                                                                                                                   | <b>TS: Pd(PH<sub>3</sub>)<sub>2</sub>CH<sub>3</sub>Cl +<br/>MgCH<sub>3</sub>Cl</b><br>-1886.06<br>(-94.38)                                                                                                                                                                                                                                                                                                                                                                                                                                                                                                                                                                                                                                                                                                                       | <b>P: Pd(PH<sub>3</sub>)<sub>2</sub>CH<sub>3</sub>Cl +<br/>MgCH<sub>3</sub>Cl</b><br>-1907.77                                                                                                                                                                                                                                                                                                                                                                                                                                                                                                                                                                                                                                                                                                                   |
| H 0.04681000 -2.73421600 3.70857300<br>Pd -0.57754500 -4.31546600 1.07736500<br>H -2.32976000 -1.99809100 -0.55322000<br>H -1.98297100 -2.37104700 3.17482000<br>C 0.24684000 -5.36985200 2.64977000<br>P -1.61314800 -3.21363400 -0.70358000<br>H -0.84098800 -2.81768300 -1.82315200<br>H -2.61250000 -3.92761900 -1.40631600<br>P -0.75874000 -2.71538200 2.54651000<br>H -0.42894500 -1.41090300 2.09997900<br>H 1.28110000 -5.03763900 2.78330700<br>H 0.21757800 -6.40945500 2.31735200<br>H -0.31008100 -5.25742700 3.58465600<br>Cl -0.01831300 -6.06716700 -0.42618800<br>Mg 2.15530000 -5.32556600 -1.49363300<br>Cl 2.28078000 -6.38938900 -3.47054000<br>C 3.23133200 -3.82222700 -0.46968600<br>H 3.41953400 -4.03194200 0.59380100<br>H 2.77601700 -2.82151600 -0.51524300<br>H 4.22101800 -3.73180400 -0.94313200 | H 0.22494600 -2.72581500 3.58882500<br>Pd -0.29940700 -4.21042600 0.90140200<br>H -1.44811900 -1.49780700 -0.54645500<br>H -1.63823500 -3.76112400 3.67626000<br>C 0.64143600 -5.40866700 2.31212800<br>P -1.43854200 -2.91355200 -0.64104700<br>H -1.14590600 -2.99491200 -2.02329200<br>H -2.84120200 -3.08501800 -0.74798300<br>P -0.80877700 -3.13715500 2.71248300<br>H -1.50101200 -1.89872400 2.65223000<br>H 1.69966500 -5.13483300 2.28155600<br>H 0.47008000 -6.41624800 1.92567500<br>H 0.28661300 -5.36955300 3.34784800<br>Cl -0.062730100 -6.16752400 -0.66582700<br>Mg 1.52001900 -5.41478600 -1.34603700<br>Cl 2.68181300 -6.50607700 -2.91541600<br>C 2.12040400 -3.57954400 -0.39790800<br>H 3.11723200 -3.89191600 -0.04501700<br>H 1.75015600 -2.89321600 0.37379900<br>H 2.28830300 -2.95114000 -1.28798400 | Pd -0.06374500 0.94031200 0.16194700<br>C -1.41350600 1.16880700 1.72486200<br>H -0.78581900 -1.93248500 -1.27298700<br>Cl 3.26808000 -0.10425800 1.23700100<br>H 0.45638800 3.24660100 1.64372800<br>H 2.58971900 1.59018700 -1.63581400<br>Mg 1.70061100 1.20550500 2.21488100<br>Cl 1.46287500 1.97959000 4.29617300<br>C 0.66992100 2.84782800 0.64321800<br>H 1.71641900 3.05830600 0.38130100<br>P 1.43437000 0.77828800 -1.59361400<br>H 0.05531800 3.44073600 -0.04734800<br>H 2.04637800 -0.45741000 -1.90264200<br>P -1.00623900 -1.10596000 -0.14036500<br>H -2.41756000 -1.22571300 -0.10753400<br>H -0.71470800 -2.08125700 0.84291900<br>H 0.95888900 1.07013200 -2.90212600<br>H -1.74177600 0.30004400 2.18491100<br>H -2.27416900 1.63527600 1.22667700<br>H -1.07062900 1.83338200 2.52100700 |

| RC: ${}^1\text{Fe}(\text{CO})_4 + \text{CH}_4$ |             |             | -2211.23    | TS: ${}^1\text{Fe}(\text{CO})_4 + \text{CH}_4$ |             |             | -2199.50<br>(-751.90) | P: ${}^1\text{Fe}(\text{CO})_4 + \text{CH}_4$ |             |             | -2208.92    |
|------------------------------------------------|-------------|-------------|-------------|------------------------------------------------|-------------|-------------|-----------------------|-----------------------------------------------|-------------|-------------|-------------|
| Fe                                             | 0.35780891  | 0.03825438  | 0.48752113  | Fe                                             | 0.34088938  | 0.01304017  | 0.46047141            | Fe                                            | 0.29982211  | -0.00309893 | 0.42404388  |
| O                                              | -1.43802173 | -1.12505914 | -1.45217119 | O                                              | -1.75076143 | -0.80080398 | -1.37625394           | O                                             | -2.07990493 | -0.37020876 | -1.20397145 |
| C                                              | -0.66267593 | -0.72030439 | -0.69282048 | C                                              | -0.92335517 | -0.47287970 | -0.64254083           | C                                             | -1.13897130 | -0.22101296 | -0.55807796 |
| O                                              | -0.42629797 | 2.40938870  | 1.94586288  | O                                              | -0.49825553 | 2.41831727  | 1.90230645            | O                                             | -0.56545804 | 2.40898995  | 1.83351285  |
| O                                              | 1.31561351  | 1.80643037  | -1.63395533 | O                                              | 1.69917876  | 1.48348141  | -1.65721901           | O                                             | 2.02676697  | 1.02740617  | -1.66830284 |
| O                                              | -1.02975892 | -1.52409692 | 2.53166218  | O                                              | -0.63146929 | -1.83766027 | 2.49088409            | O                                             | -0.22973443 | -2.13374035 | 2.32203604  |
| C                                              | -0.45657654 | -0.92268086 | 1.73313339  | C                                              | -0.26352657 | -1.09418265 | 1.69324896            | C                                             | -0.05907275 | -1.26273353 | 1.59062569  |
| C                                              | 0.96585099  | 1.09867994  | -0.79455246 | C                                              | 1.14917883  | 0.91693750  | -0.82001466           | C                                             | 1.31518802  | 0.66254168  | -0.84171635 |
| C                                              | -0.03387049 | 1.46193516  | 1.40712795  | C                                              | -0.16094089 | 1.47030656  | 1.33983353            | C                                             | -0.23953997 | 1.45977257  | 1.27227726  |
| C                                              | 2.63288174  | -0.90589212 | 1.00990777  | C                                              | 2.30114584  | -0.40453727 | 1.22610154            | C                                             | 2.07286263  | 0.15490377  | 1.54879572  |
| H                                              | 3.49023136  | -0.75012839 | 0.35348151  | H                                              | 3.11113121  | -0.34009600 | 0.49583177            | H                                             | 2.55967332  | 1.11154984  | 1.34507853  |
| H                                              | 2.76932847  | -1.78794449 | 1.63748323  | H                                              | 2.39620583  | -1.34546235 | 1.77286522            | H                                             | 2.73999583  | -0.66394612 | 1.27566653  |
| H                                              | 2.49816316  | -0.02749979 | 1.64450324  | H                                              | 2.39720271  | 0.42297797  | 1.93088228            | H                                             | 1.84296859  | 0.10398148  | 2.61564658  |
| H                                              | 1.77347037  | -1.16072056 | 0.32248459  | H                                              | 1.34784361  | -1.05951162 | 0.16991896            | H                                             | 0.91467813  | -1.22524559 | -0.19518736 |

| RC: ${}^1\text{Fe}(\text{CO})_4 + \text{CH}_3\text{Cl}$ |             |             | -2181.41    | TS: ${}^1\text{Fe}(\text{CO})_4 + \text{CH}_3\text{Cl}$ |             |             | -2146.98<br>(-495.43) | P: ${}^1\text{Fe}(\text{CO})_4 + \text{CH}_3\text{Cl}$ |             |             | -2187.36    |
|---------------------------------------------------------|-------------|-------------|-------------|---------------------------------------------------------|-------------|-------------|-----------------------|--------------------------------------------------------|-------------|-------------|-------------|
| Fe                                                      | -0.01936064 | -0.15862999 | -0.26387674 | Fe                                                      | -0.01429889 | -0.11269874 | -0.13857699           | Fe                                                     | 0.33093818  | -0.02881487 | 0.42087429  |
| O                                                       | -0.05035324 | -0.34955885 | -3.14878138 | O                                                       | -0.06852218 | -0.49641017 | -3.02548199           | O                                                      | -2.07971223 | -0.36596849 | -1.20104467 |
| C                                                       | -0.02973485 | -0.20042048 | -2.00013474 | C                                                       | -0.03596406 | -0.25567690 | -1.89807899           | C                                                      | -1.13011226 | -0.24308374 | -0.57146966 |
| O                                                       | -0.28789361 | -2.56497274 | 1.31632131  | O                                                       | -0.33404494 | -2.82228609 | 0.79166232            | O                                                      | -0.55415038 | 2.34501538  | 1.79235124  |
| O                                                       | -2.93782201 | -0.03451368 | -0.35282162 | O                                                       | -2.91481956 | 0.23119949  | 0.08394145            | O                                                      | 1.95097857  | 1.38156260  | -1.56368296 |
| O                                                       | 2.85057573  | -0.69917106 | -0.37188667 | O                                                       | 2.88603516  | -0.46463908 | 0.07135333            | O                                                      | -0.38352240 | -1.88404422 | 2.56541825  |
| C                                                       | 1.72388824  | -0.45826832 | -0.31687186 | C                                                       | 1.74573416  | -0.31735114 | 0.00222885            | C                                                      | -0.13022520 | -1.15219512 | 1.72318340  |
| C                                                       | -1.78551936 | -0.05560673 | -0.30540754 | C                                                       | -1.77238968 | 0.10424892  | 0.00992306            | C                                                      | 1.29477969  | 0.84115422  | -0.79786029 |
| C                                                       | -0.17602063 | -1.56121316 | 0.74657031  | C                                                       | -0.20459094 | -1.72268538 | 0.45468050            | C                                                      | -0.20994704 | 1.39624218  | 1.23977484  |
| C                                                       | 0.23109620  | 1.97471388  | 2.43450193  | C                                                       | 0.14161184  | 1.15746084  | 2.12213979            | C                                                      | 2.06998184  | 0.18331183  | 1.57217398  |
| H                                                       | 0.35111866  | 3.01126695  | 2.75725060  | H                                                       | -0.69828766 | 1.77643887  | 2.42327756            | H                                                      | 2.56501440  | 1.13675228  | 1.37234080  |
| H                                                       | 1.06653635  | 1.35913434  | 2.76977676  | H                                                       | 1.11104070  | 1.54760304  | 2.41749445            | H                                                      | 2.69916884  | -0.65242942 | 1.26316322  |
| H                                                       | -0.72146230 | 1.56535314  | 2.77266635  | H                                                       | 0.01015151  | 0.11363674  | 2.37992803            | H                                                      | 1.84822299  | 0.12773522  | 2.64077392  |
| Cl                                                      | 0.22986139  | 1.98869686  | 0.64936339  | Cl                                                      | 0.26296998  | 2.19488517  | 0.21572376            | Cl                                                     | 1.18469389  | -1.91172218 | -0.58711381 |

| RC: ${}^1\text{Fe}(\text{CO})_4 + \text{C}_2\text{H}_6$ |             |             | -2589.31    | TS: ${}^1\text{Fe}(\text{CO})_4 + \text{C}_2\text{H}_6$ |             |             | -2541.36<br>(-621.71) | P: ${}^1\text{Fe}(\text{CO})_4 + \text{C}_2\text{H}_6$ |             |             | -2578.97    |
|---------------------------------------------------------|-------------|-------------|-------------|---------------------------------------------------------|-------------|-------------|-----------------------|--------------------------------------------------------|-------------|-------------|-------------|
| Fe                                                      | -0.04757578 | 0.12197323  | 0.39976386  | Fe                                                      | -0.00983488 | 0.17516124  | -0.08517160           | Fe                                                     | 0.32945709  | -0.05469896 | 0.40141263  |
| O                                                       | -2.05325228 | -0.66088348 | -1.51528489 | O                                                       | 0.03977797  | -2.41684263 | -1.37533315           | O                                                      | -2.07842475 | -0.38647333 | -1.19443617 |
| C                                                       | -1.18535077 | -0.43464220 | -0.78187352 | C                                                       | 0.01829803  | -1.35001954 | -0.92516537           | C                                                      | -1.12452707 | -0.25479792 | -0.56346469 |
| O                                                       | -0.50757653 | 2.43697079  | 2.05278637  | O                                                       | 0.04963446  | -0.44037329 | 2.74791143            | O                                                      | -0.57921349 | 2.34363627  | 1.77100097  |
| O                                                       | 1.13340471  | 1.87593406  | -1.62519506 | O                                                       | -2.93023373 | 0.06562753  | -0.15108061           | O                                                      | 2.02402957  | 1.20595415  | -1.59763694 |
| O                                                       | -1.41089828 | -1.51241064 | 2.40975412  | O                                                       | 2.90979022  | 0.22306481  | -0.22321677           | O                                                      | -0.25456433 | -1.99979697 | 2.48286431  |
| C                                                       | -0.85371760 | -0.88414754 | 1.62202266  | C                                                       | 1.75732761  | 0.21116134  | -0.17200543           | C                                                      | -0.05513131 | -1.21808069 | 1.66329281  |
| C                                                       | 0.68936189  | 1.17380734  | -0.82802158 | C                                                       | -1.77794365 | 0.11633342  | -0.12703553           | C                                                      | 1.32854932  | 0.72875454  | -0.81588334 |
| C                                                       | -0.22338940 | 1.49467208  | 1.44152169  | C                                                       | 0.02439530  | -0.13155813 | 1.63377413            | C                                                      | -0.22171034 | 1.39346745  | 1.22810678  |
| C                                                       | 4.12323181  | -2.01965385 | 0.77444093  | C                                                       | -0.06802213 | 2.44617394  | 0.15844692            | C                                                      | 2.09186231  | 0.13861601  | 1.53626919  |
| H                                                       | 4.37797617  | -2.91775412 | 1.9959108   | H                                                       | -0.93305138 | 2.39110789  | 0.81850167            | H                                                      | 2.57838291  | 1.09609337  | 1.33285040  |
| H                                                       | 4.77527639  | -1.99747048 | 1.65551947  | H                                                       | -0.14124653 | 3.38285705  | -0.39280861           | H                                                      | 2.76410824  | -0.67845192 | 1.26900014  |
| H                                                       | 4.37806942  | -1.15095074 | 0.15590036  | H                                                       | 0.85534800  | 2.47551268  | 0.73584725            | H                                                      | 1.86838686  | 0.09567192  | 2.60540678  |
| C                                                       | 2.65555387  | -2.01310953 | 1.17107700  | C                                                       | -0.06928757 | 1.74877952  | -1.70370198           | C                                                      | 1.04552014  | -1.78562933 | -0.55873600 |
| H                                                       | 2.40526372  | -1.11480739 | 1.74956176  | H                                                       | 0.80092663  | 2.35803051  | -1.94793869           | H                                                      | 2.04297912  | -2.00467554 | -0.17386477 |
| H                                                       | 2.40111484  | -2.88039174 | 1.79176817  | H                                                       | -0.99272043 | 2.27761731  | -1.93855186           | H                                                      | 1.09431879  | -1.63433301 | -1.64021001 |
| H                                                       | 2.00501656  | -2.04441900 | 0.28792820  | H                                                       | -0.03075773 | 0.85424487  | -2.32574463           | H                                                      | 0.38366888  | -2.63432263 | -0.36763315 |

| RC: ${}^3\text{Fe}(\text{CO})_4 + \text{CH}_4$ |             |             | -2209.92    | TS: ${}^3\text{Fe}(\text{CO})_4 + \text{CH}_4$ |             |             | -2145.49<br>(-489.73) | P: ${}^3\text{Fe}(\text{CO})_4 + \text{CH}_4$ |             |             | -2164.77    |
|------------------------------------------------|-------------|-------------|-------------|------------------------------------------------|-------------|-------------|-----------------------|-----------------------------------------------|-------------|-------------|-------------|
| Fe                                             | -0.36045477 | 1.44503040  | 0.16561190  | Fe                                             | 0.09287166  | -0.24812821 | -0.06899336           | Fe                                            | 0.53713843  | -0.17975285 | 0.34830057  |
| O                                              | -3.17435394 | 0.64507153  | -0.28145876 | O                                              | -2.62942112 | -0.79307697 | -1.28455203           | O                                             | -2.11315200 | 0.15966216  | -0.90648861 |
| C                                              | -2.06402726 | 0.91102334  | -0.13247043 | C                                              | -1.91994720 | -0.71776795 | -0.37157109           | C                                             | -1.06587002 | -0.34682487 | -0.64845705 |
| O                                              | -0.58652907 | 4.18147068  | -0.81257591 | O                                              | -0.52744035 | 2.51399774  | -0.9388924            | O                                             | -0.67984279 | 2.09690269  | 1.6883136   |
| O                                              | 2.59203816  | 1.25639209  | 0.09505895  | O                                              | 3.00176103  | 0.06150096  | -0.40835124           | O                                             | 1.85470168  | 1.37033110  | -1.78468262 |
| O                                              | -0.62352327 | 2.18700225  | 2.97180180  | O                                              | 0.11474714  | 0.40050811  | 2.76521106            | O                                             | -0.16380112 | -2.15566814 | 2.43210369  |
| C                                              | -0.51794937 | 1.87568685  | 1.86598424  | C                                              | 0.08113471  | 0.10208173  | 1.64192049            | C                                             | 0.10806910  | -1.44473225 | 1.56702666  |
| C                                              | 1.44091545  | 1.28204284  | 0.09760814  | C                                              | 1.86912714  | -0.05348660 | -0.23431332           | C                                             | 1.34687047  | 0.70277584  | -0.99430482 |
| C                                              | -0.49501590 | 3.09258423  | -0.44267807 | C                                              | -0.34185369 | 1.40834172  | -0.68014349           | C                                             | -0.21052383 | 1.19252145  | 1.15308522  |
| C                                              | 0.08789916  | -2.02503152 | -1.45483739 | C                                              | 0.32374573  | -2.18734255 | -0.71232717           | C                                             | 2.11558875  | 0.37391197  | 1.55797932  |
| H                                              | 1.09851479  | -2.42498358 | -1.33572680 | H                                              | 1.28589253  | -2.63674876 | -0.45812314           | H                                             | 2.52266296  | 1.36170125  | 1.33335893  |
| H                                              | 0.03270865  | -1.44422535 | -2.37938684 | H                                              | 0.28222911  | -1.98112995 | -1.79171821           | H                                             | 2.83618817  | -0.40099241 | 1.26398976  |
| H                                              | -0.62678416 | -2.85125118 | -1.50053478 | H                                              | -0.48699516 | -2.86696593 | -0.43884361           | H                                             | 1.89843995  | 0.29313169  | 2.62497843  |
| H                                              | -0.15228133 | -1.38180499 | -0.60419182 | H                                              | 0.08642487  | -1.23453928 | 1.11729754            | H                                             | -0.77273924 | -1.32203771 | -1.16249410 |

|                                                                             |             |             |                 |                                                                             |             |             |                                     |                                                                            |             |             |                 |
|-----------------------------------------------------------------------------|-------------|-------------|-----------------|-----------------------------------------------------------------------------|-------------|-------------|-------------------------------------|----------------------------------------------------------------------------|-------------|-------------|-----------------|
| <b>RC: <math>{}^3\text{Fe}(\text{CO})_4 + \text{CH}_3\text{Cl}</math></b>   |             |             | <b>-2172.42</b> | <b>TS: <math>{}^3\text{Fe}(\text{CO})_4 + \text{CH}_3\text{Cl}</math></b>   |             |             | <b>-2129.10</b><br><b>(-916.88)</b> | <b>P: <math>{}^3\text{Fe}(\text{CO})_4 + \text{CH}_3\text{Cl}</math></b>   |             |             | <b>-2142.99</b> |
| Fe                                                                          | -0.34069632 | -1.67506325 | -1.37061419     | Fe                                                                          | -0.05221000 | -0.23784249 | -0.00622311                         | Fe                                                                         | -0.06045095 | -0.33650518 | 0.25899106      |
| O                                                                           | -0.47406155 | -2.87492200 | -4.02375744     | O                                                                           | -0.14607620 | -0.44530647 | -2.91364074                         | O                                                                          | -0.04300957 | 0.20371117  | -2.45874560     |
| C                                                                           | -0.42144317 | -2.38517732 | -2.98054481     | C                                                                           | -0.10720695 | -0.34765992 | -1.76725107                         | C                                                                          | 0.04897961  | 0.67541623  | -1.37204356     |
| O                                                                           | -0.63829501 | -4.20028798 | 0.05399342      | O                                                                           | -0.46082747 | -3.08660011 | 0.48799131                          | O                                                                          | -0.48334251 | -3.27620888 | -0.01057861     |
| O                                                                           | -3.16247606 | -0.80021143 | -1.19110892     | O                                                                           | -2.95594626 | 0.30805302  | 0.03917483                          | O                                                                          | -2.90223955 | 0.31461856  | 0.54804831      |
| O                                                                           | 2.60771639  | -1.49123154 | -1.19658068     | O                                                                           | 2.88446525  | -0.55418660 | -0.09168333                         | O                                                                          | 2.85913470  | -0.51481196 | 0.41035723      |
| C                                                                           | 1.45762776  | -1.51070099 | -1.24755242     | C                                                                           | 1.75458150  | -0.35642512 | -0.00743569                         | C                                                                          | 1.71479310  | -0.43893406 | 0.33025335      |
| C                                                                           | -2.04988181 | -1.09147154 | -1.24570993     | C                                                                           | -1.81453089 | 0.17052988  | 0.07233063                          | C                                                                          | -1.78805708 | 0.06521306  | 0.41412643      |
| C                                                                           | -0.52031123 | -3.19276841 | -0.49559636     | C                                                                           | -0.29767048 | -1.95444520 | 0.33843918                          | C                                                                          | -0.32165081 | -2.14311884 | 0.07930987      |
| C                                                                           | -0.60104435 | 2.51967017  | 1.60368051      | C                                                                           | 0.18794200  | 1.10724840  | 1.84668837                          | C                                                                          | 0.08738189  | 0.35356021  | -2.17316838     |
| H                                                                           | -1.47193556 | 2.82564098  | 2.18763196      | H                                                                           | -0.64572735 | 1.66329919  | 2.26519501                          | H                                                                          | 0.22580141  | 1.43702679  | 2.08907176      |
| H                                                                           | 0.31527905  | 2.71717560  | 2.16441144      | H                                                                           | 1.16427197  | 1.39597302  | 2.22453683                          | H                                                                          | 0.94392087  | -0.08725285 | 2.69046601      |
| H                                                                           | -0.66868477 | 1.45759474  | 1.35493272      | H                                                                           | 0.03111061  | 0.01852790  | 2.02368846                          | H                                                                          | -0.82453783 | 0.14204165  | 2.73836349      |
| Cl                                                                          | -0.56405741 | 3.45515372  | 0.10244891      | Cl                                                                          | 0.346073782 | 2.44391468  | 0.13213788                          | Cl                                                                         | 0.30969799  | 2.45304879  | -1.15536523     |
| <b>RC: <math>{}^3\text{Fe}(\text{CO})_4 + \text{C}_2\text{H}_6</math></b>   |             |             | <b>-2589.38</b> | <b>TS: <math>{}^3\text{Fe}(\text{CO})_4 + \text{C}_2\text{H}_6</math></b>   |             |             | <b>-2512.46</b><br><b>(-1317.7)</b> | <b>P: <math>{}^3\text{Fe}(\text{CO})_4 + \text{C}_2\text{H}_6</math></b>   |             |             | <b>-2538.23</b> |
| Fe                                                                          | -0.59072821 | 0.25245306  | 1.45241591      | Fe                                                                          | -0.04136211 | -0.16090204 | -0.22890819                         | Fe                                                                         | -0.53238367 | -1.81860822 | -1.26600307     |
| O                                                                           | -3.36548156 | 0.79878767  | 2.35461986      | O                                                                           | -0.20957964 | -0.87958140 | -3.05326855                         | O                                                                          | -0.08612307 | -0.69001082 | -3.90662522     |
| C                                                                           | -2.30123265 | 0.58644968  | 1.96058766      | C                                                                           | -0.14121423 | -0.58592087 | -1.93892560                         | C                                                                          | -0.26477948 | -1.14495502 | -2.86266356     |
| O                                                                           | 0.76496120  | 2.19334485  | 3.16564208      | O                                                                           | -0.41525712 | -2.88147552 | 0.75281234                          | O                                                                          | -0.84282299 | -4.59700849 | -2.10279719     |
| O                                                                           | 1.63347738  | -0.19525209 | -0.46218390     | O                                                                           | -2.92757937 | 0.40142484  | -0.02945085                         | O                                                                          | -3.39359593 | -1.20976549 | -1.12071905     |
| O                                                                           | -0.06439036 | -2.02463590 | 3.20853907      | O                                                                           | 2.89178524  | -0.43996362 | -0.15478421                         | O                                                                          | 2.29234496  | -2.03467013 | -0.52353996     |
| C                                                                           | -0.28158435 | -1.13616559 | 2.49999958      | C                                                                           | 1.75278531  | -0.26193398 | -0.14971060                         | C                                                                          | 1.17648430  | -1.97478895 | -0.79851145     |
| C                                                                           | 0.73748872  | -0.01310671 | 0.24092336      | C                                                                           | -1.78552452 | 0.25021603  | -0.07309207                         | C                                                                          | -2.27438015 | -1.47433683 | -1.16157109     |
| C                                                                           | 0.22931159  | 1.43667713  | 2.47420375      | C                                                                           | -0.26652571 | -1.80262801 | 0.37057845                          | C                                                                          | -0.72203363 | -3.50135787 | -1.76552450     |
| C                                                                           | -2.89789190 | 1.94557280  | -2.18945346     | C                                                                           | 0.17209802  | 0.89948577  | 2.50014276                          | C                                                                          | -0.65621501 | -3.93234701 | 2.96495923      |
| H                                                                           | -2.14871603 | 2.06650860  | -1.39283177     | H                                                                           | 0.31922761  | 1.85875619  | 2.99379841                          | H                                                                          | -1.55006977 | -3.38295202 | -2.69189497     |
| H                                                                           | -3.80576939 | 2.47993853  | -1.87159775     | H                                                                           | 1.00608708  | 0.20587278  | 2.58097933                          | H                                                                          | 0.16829784  | -4.00900554 | 2.26527585      |
| H                                                                           | -2.51222058 | 2.45684560  | -3.08416333     | H                                                                           | -0.81796333 | 0.46537014  | 2.62056380                          | H                                                                          | -0.58509244 | -4.40259182 | 3.93921808      |
| C                                                                           | -3.18417143 | 0.47822938  | -2.46642581     | H                                                                           | 1.24077310  | 2.22449752  | 0.82079858                          | H                                                                          | 0.59632573  | 0.42459440  | -0.34756403     |
| H                                                                           | -3.56770668 | -0.03182338 | -1.57021995     | C                                                                           | 0.26646136  | 1.86015994  | 0.49050440                          | C                                                                          | -0.38369545 | -0.04345257 | -0.22439488     |
| H                                                                           | -2.27703234 | -0.05536940 | -2.78740173     | H                                                                           | -0.55018281 | 2.48299791  | 0.85967168                          | H                                                                          | -0.52912288 | -0.30407897 | 0.83106820      |
| H                                                                           | -3.93580970 | 0.35637379  | -3.26045371     | H                                                                           | 0.25978308  | 1.98041451  | -0.61757049                         | H                                                                          | -1.14966928 | 0.67553990  | -0.52606716     |
| <b>RC: <math>{}^1\text{Fe}(\text{PH}_3)_4 + \text{CH}_3\text{Cl}</math></b> |             |             | <b>-2158.16</b> | <b>TS: <math>{}^1\text{Fe}(\text{PH}_3)_4 + \text{CH}_3\text{Cl}</math></b> |             |             | <b>-2132.67</b><br><b>(-453.36)</b> | <b>P: <math>{}^1\text{Fe}(\text{PH}_3)_4 + \text{CH}_3\text{Cl}</math></b> |             |             | <b>-2191.42</b> |
| P                                                                           | -0.80375100 | 0.45387400  | -2.21997000     | Fe                                                                          | -0.19999100 | 0.51819900  | 0.31491100                          | Fe                                                                         | -0.59157902 | 0.25582855  | 0.45813640      |
| P                                                                           | -2.33868000 | 0.36057100  | 1.08215400      | P                                                                           | -1.54918900 | -0.97429200 | 0.80668200                          | P                                                                          | 0.83842754  | -1.14415962 | -0.09902335     |
| H                                                                           | -1.45736400 | -0.74994700 | -2.64997500     | P                                                                           | 0.92658500  | -0.09182600 | -1.34398700                         | P                                                                          | -2.30397809 | -0.80935438 | -0.23311807     |
| P                                                                           | 0.52325200  | 0.12795800  | 0.37936100      | H                                                                           | -2.56311800 | -1.43201700 | -0.09313200                         | Cl                                                                         | -2.11569916 | 1.88516911  | 1.11776584      |
| H                                                                           | 1.48977600  | -0.45742100 | -0.49854700     | P                                                                           | -1.61505800 | 1.40879700  | -0.99317700                         | P                                                                          | -0.75972736 | -0.36472944 | 2.48672131      |
| H                                                                           | 0.47876100  | 0.01358900  | -2.68250600     | H                                                                           | -2.25908200 | 0.61996000  | -1.98667700                         | H                                                                          | 0.09321656  | -1.36232815 | 3.04549222      |
| H                                                                           | -3.09739600 | 3.63341600  | -0.73791200     | H                                                                           | -2.47096900 | -0.85709200 | 1.91266800                          | H                                                                          | 1.69637477  | -1.73062237 | 0.87726443      |
| P                                                                           | -2.80448700 | 2.28037800  | -1.10973300     | H                                                                           | 1.13422000  | -0.35999900 | 3.03087600                          | H                                                                          | -0.12881374 | 2.85991644  | -1.05606240     |
| H                                                                           | -2.98792700 | 2.50718800  | -2.51091900     | P                                                                           | 1.25830600  | -0.33379300 | 1.60101200                          | P                                                                          | -0.40424292 | 1.48676814  | -1.26733223     |
| H                                                                           | -4.13203500 | 1.80343500  | -0.89183200     | H                                                                           | 1.59463200  | -1.71075400 | 1.47905200                          | H                                                                          | 0.60079006  | 1.25882890  | -2.25383865     |
| H                                                                           | -1.12315300 | 1.14652800  | -3.43358700     | H                                                                           | 2.59813100  | 0.15744500  | 1.61582400                          | H                                                                          | -1.48224116 | 1.65903498  | -2.17877592     |
| H                                                                           | -2.64327800 | 0.86805700  | 2.39866200      | H                                                                           | -1.14473700 | -2.29479300 | 1.18083000                          | H                                                                          | 1.61436710  | 0.86413283  | 1.93993007      |
| H                                                                           | -3.71698600 | 0.08321600  | 0.81272000      | H                                                                           | 1.96649200  | 0.68080400  | -1.97546300                         | C                                                                          | 1.02692677  | 1.35403347  | 1.14924363      |
| H                                                                           | -2.05856100 | -0.94730800 | 1.59096000      | H                                                                           | 1.72497800  | -1.27958700 | -1.32648600                         | H                                                                          | 0.60605542  | 2.27608831  | 1.56564178      |
| H                                                                           | 1.49968900  | 0.69998200  | 1.25915300      | H                                                                           | 0.31841200  | -0.42291500 | -2.59647300                         | H                                                                          | 1.75813305  | 1.63593006  | 0.37709519      |
| H                                                                           | 0.33534100  | -1.05484100 | 1.15623700      | H                                                                           | -2.81738500 | 2.04949600  | -0.54093600                         | H                                                                          | -0.55032894 | 0.61820700  | 3.48464782      |
| C                                                                           | -0.23667100 | 4.01191400  | 1.63766700      | H                                                                           | -1.23893700 | 2.47951700  | -1.85871500                         | H                                                                          | -1.97577205 | -0.88951974 | 3.00428730      |
| Cl                                                                          | -0.01087700 | 3.22878900  | 0.02500500      | Cl                                                                          | 0.50056100  | 2.69078100  | 0.99338400                          | H                                                                          | 0.51278586  | -2.37348579 | -0.75005351     |
| H                                                                           | 0.33816000  | 4.94131700  | 1.63448900      | C                                                                           | -1.02166600 | 2.09593000  | 2.28056000                          | H                                                                          | 1.88528162  | -0.78715939 | -0.99899407     |
| H                                                                           | 0.13060300  | 3.32545200  | 2.40248900      | H                                                                           | -0.76272800 | 1.25000800  | 2.91186800                          | H                                                                          | -3.17038514 | -0.24073174 | -1.20938267     |
| H                                                                           | -1.30151100 | 4.20923600  | 1.77282500      | H                                                                           | -1.99187100 | 1.99200600  | 1.80198900                          | H                                                                          | -2.20403945 | -2.08625409 | -0.86490849     |
|                                                                             |             |             |                 | H                                                                           | -0.94022500 | 3.03799800  | 2.82003400                          | H                                                                          | -3.34520472 | -1.18160906 | 0.66387136      |

| RC: ${}^I\text{Fe}(\text{PH}_3)_4\text{CH}_3\text{Cl} + \text{MgClCH}_3$ | -2769.08    | TS: ${}^I\text{Fe}(\text{PH}_3)_4\text{CH}_3\text{Cl} + \text{MgClCH}_3$ | -2747.17<br>(-76.54) | P: ${}^I\text{Fe}(\text{PH}_3)_4\text{CH}_3\text{Cl} + \text{MgClCH}_3$ | -2779.67    |             |             |
|--------------------------------------------------------------------------|-------------|--------------------------------------------------------------------------|----------------------|-------------------------------------------------------------------------|-------------|-------------|-------------|
| Fe                                                                       | 0.22311800  | -2.16102900                                                              | -0.87487900          | Fe                                                                      | 0.14317700  | 0.33831600  | 0.36281800  |
| P                                                                        | 1.46079000  | -3.82768700                                                              | -0.90393800          | P                                                                       | 0.20185000  | -1.76178400 | 0.49668600  |
| P                                                                        | -1.24953700 | -2.91655300                                                              | -2.23418200          | P                                                                       | 2.24617600  | 0.58436500  | 0.27804800  |
| Cl                                                                       | -1.08636300 | -0.17112800                                                              | -0.82471400          | Cl                                                                      | -0.53977300 | 5.64742100  | 2.16217200  |
| P                                                                        | -0.79084200 | -2.81495600                                                              | 0.90379600           | P                                                                       | -0.21781900 | 0.35309800  | -1.72378800 |
| H                                                                        | -0.17840100 | -3.78750800                                                              | 1.73872800           | H                                                                       | -0.64669200 | -0.82388500 | -2.39906300 |
| H                                                                        | 1.79162100  | -4.48957800                                                              | 0.31188200           | H                                                                       | -0.39733100 | -2.57586600 | -0.50930200 |
| H                                                                        | 1.79676600  | 0.20212000                                                               | -2.02970700          | H                                                                       | -1.04886700 | 1.53221000  | 2.91771300  |
| P                                                                        | 1.36255100  | -1.10860400                                                              | -2.34846900          | P                                                                       | -0.07012200 | 0.61523000  | 2.45191300  |
| H                                                                        | 2.62032400  | -1.60803800                                                              | -2.78824700          | H                                                                       | -0.45183300 | -0.46622800 | 3.29451200  |
| H                                                                        | 0.84567200  | -0.81373200                                                              | -3.64039400          | H                                                                       | 0.98753400  | 1.08779600  | 3.28297300  |
| H                                                                        | 1.71068900  | -1.96127600                                                              | 1.40117200           | H                                                                       | -2.34994300 | -0.50782100 | -0.36391200 |
| C                                                                        | 1.62588900  | -1.41343600                                                              | 0.45186000           | C                                                                       | -1.92819300 | 0.09806200  | 0.45250300  |
| H                                                                        | 1.30835400  | -0.39389500                                                              | 0.69418300           | H                                                                       | -2.42113000 | 1.07730300  | 0.40304500  |
| H                                                                        | 2.65107000  | -1.35275900                                                              | 0.05753800           | H                                                                       | -2.28742400 | -0.38862700 | 1.37204000  |
| H                                                                        | -1.06486200 | -1.83424400                                                              | 1.88933800           | H                                                                       | -1.23419400 | 1.20479800  | -2.23088900 |
| H                                                                        | -2.07821800 | -3.41963900                                                              | 0.86580300           | H                                                                       | 0.77714600  | 0.72134300  | -2.67690900 |
| H                                                                        | 1.13999200  | -5.00927000                                                              | -1.63761900          | H                                                                       | 1.42182900  | -2.50066200 | 0.55652500  |
| H                                                                        | 2.79880400  | -3.71637600                                                              | -1.37898800          | H                                                                       | -0.41647500 | -0.24375100 | -1.58970400 |
| H                                                                        | -1.51652800 | -2.27215100                                                              | -3.47539300          | H                                                                       | 2.93238500  | 1.42165100  | 1.20825000  |
| H                                                                        | -1.14429500 | -4.22970000                                                              | -2.77859100          | H                                                                       | 3.14945300  | -0.51195500 | 0.40962000  |
| H                                                                        | -2.61462000 | -3.03447800                                                              | -1.84802500          | H                                                                       | 2.88910000  | -0.38822000 | -1.87037400 |
| H                                                                        | -2.25047700 | 4.19131300                                                               | 0.71899300           | C                                                                       | 0.00242200  | 2.43113000  | 0.23343500  |
| Mg                                                                       | -1.71611600 | 1.54332000                                                               | 0.91665100           | H                                                                       | 0.50734700  | 2.91424300  | 1.08552200  |
| Cl                                                                       | -1.86202500 | 0.56030300                                                               | 2.95480700           | H                                                                       | -1.08146300 | 2.63687900  | 0.26609500  |
| C                                                                        | -1.97663900 | 3.41098600                                                               | -0.00547000          | H                                                                       | 0.43516700  | 2.80124300  | -0.70962900 |
| H                                                                        | -1.06601500 | 3.75723000                                                               | -0.51600100          | Mg                                                                      | -0.41049000 | 4.84484300  | 0.09438300  |
| H                                                                        | -2.76879600 | 3.39512400                                                               | -0.76809100          | Cl                                                                      | -0.43457200 | 5.41420800  | -2.05400200 |

| RC: ${}^I\text{Fe}(\text{PH}_3)_4 + \text{C}_2\text{H}_6$ | -2569.22    | TS: ${}^I\text{Fe}(\text{PH}_3)_4 + \text{C}_2\text{H}_6$ | -2522.4<br>(-675.54) | P: ${}^I\text{Fe}(\text{PH}_3)_4$ | -2779.67    |             |             |
|-----------------------------------------------------------|-------------|-----------------------------------------------------------|----------------------|-----------------------------------|-------------|-------------|-------------|
| Fe                                                        | -0.22673700 | 0.30274100                                                | 0.28184800           | Fe                                | -0.14723100 | 0.33717600  | 0.27365000  |
| P                                                         | -1.33735100 | -1.44900000                                               | 0.63656700           | P                                 | -1.62410600 | -0.92102100 | 0.98472200  |
| P                                                         | 0.87892500  | -0.46395000                                               | -1.33607000          | P                                 | 1.09114200  | 0.13744700  | -1.37337300 |
| C                                                         | 0.85196400  | 2.06306700                                                | -0.02781000          | H                                 | -1.85757900 | -2.15943800 | 0.29884100  |
| P                                                         | -1.67780600 | 1.31826800                                                | -0.84341100          | P                                 | -1.55659700 | 1.49536800  | -0.78076900 |
| H                                                         | -3.03574300 | 0.88401900                                                | -0.91144400          | H                                 | -2.97372100 | 1.33644600  | -0.66771600 |
| H                                                         | -2.76401000 | -1.45320100                                               | 0.56068800           | H                                 | -3.01840300 | -0.58808600 | 1.04442100  |
| H                                                         | 1.53139800  | 1.07106300                                                | 2.64424000           | H                                 | 1.92169900  | 0.46503800  | 2.43841000  |
| P                                                         | 1.22669600  | -0.00301200                                               | 1.76442000           | P                                 | 1.27258900  | -0.49179200 | 1.59097100  |
| H                                                         | 1.08318000  | -0.98921200                                               | 2.78605500           | H                                 | 0.95811300  | -1.41593900 | 2.63684700  |
| H                                                         | 2.58254300  | -0.32213100                                               | 1.45292300           | H                                 | 2.42729000  | -1.16044800 | 1.19873600  |
| H                                                         | -2.38582700 | 1.13237700                                                | 1.73313000           | H                                 | -1.61640900 | -1.54152600 | 2.27921200  |
| C                                                         | -1.29517800 | 1.11099100                                                | 1.88287700           | H                                 | 2.10476800  | 1.07171900  | -1.80596700 |
| H                                                         | -0.97302000 | 2.14696100                                                | 2.04755500           | H                                 | 1.97717400  | -0.97670900 | -1.49676300 |
| H                                                         | -1.15643000 | 0.57511600                                                | 2.83469500           | H                                 | 0.54845500  | 0.02133400  | -2.69019000 |
| H                                                         | -1.97524300 | 2.66642100                                                | -0.50507200          | H                                 | -1.54253900 | 2.89053900  | -0.45185900 |
| H                                                         | -1.53562200 | 1.54995300                                                | -2.24459500          | H                                 | -1.57153100 | 1.69212800  | -2.19621600 |
| H                                                         | -1.17681300 | -2.64781200                                               | -0.12482300          |                                   |             |             |             |
| H                                                         | -1.29533200 | -2.10902100                                               | 1.90298200           |                                   |             |             |             |
| H                                                         | 2.30628700  | -0.51450400                                               | -1.30059600          |                                   |             |             |             |
| H                                                         | 0.72757800  | -1.79678000                                               | -1.82943100          |                                   |             |             |             |
| H                                                         | 0.82564700  | 1.14511500                                                | -2.62730500          |                                   |             |             |             |
| H                                                         | 1.94211100  | 1.94918200                                                | 0.07718100           |                                   |             |             |             |
| H                                                         | 0.53544900  | 2.81549100                                                | 0.70551700           |                                   |             |             |             |
| H                                                         | 0.71455600  | 2.50774000                                                | -1.02570900          |                                   |             |             |             |

| RC: $\text{Fe}^{II}(\text{CO})_4 + \text{CH}_4$ | -2215.96    | TS: $\text{Fe}^{II}(\text{CO})_4 + \text{CH}_4$ | -2139.72<br>(-706.37) | P: $\text{Fe}^{II}(\text{CO})_4 + \text{CH}_4$ | -2147.21    |             |             |
|-------------------------------------------------|-------------|-------------------------------------------------|-----------------------|------------------------------------------------|-------------|-------------|-------------|
| Fe                                              | 0.04042068  | -0.07953660                                     | 0.37040726            | Fe                                             | -0.41460779 | -0.00117577 | -0.30304795 |
| O                                               | 2.37030492  | -1.33120920                                     | -0.88240770           | O                                              | 3.58658255  | -0.08127604 | 0.14206203  |
| C                                               | 1.41436381  | -0.81835428                                     | -0.36870604           | C                                              | 2.88534152  | -0.48661978 | -0.68956496 |
| O                                               | 0.13855524  | -0.56349707                                     | 3.25349800            | O                                              | 0.40068555  | -1.76910153 | 1.85472799  |
| O                                               | -2.43317279 | -1.22958468                                     | -0.69200069           | O                                              | -3.28854077 | 0.09075564  | 0.07422721  |
| O                                               | 0.09008608  | 2.81045283                                      | -0.08364265           | O                                              | 0.41252570  | 2.69910704  | 0.44248609  |
| C                                               | 0.06926760  | 1.62398981                                      | 0.09514918            | C                                              | 0.09480343  | 1.57586001  | 0.12757707  |
| C                                               | -1.41770164 | -0.75702815                                     | -0.26092077           | C                                              | -2.11144084 | 0.05658435  | -0.15991349 |
| C                                               | 0.09695582  | -0.36713753                                     | 2.07044411            | C                                              | 0.14118800  | -1.07661157 | 0.91101207  |
| C                                               | -0.33665626 | 0.65816461                                      | -4.41288564           | C                                              | -0.37216638 | -1.25934774 | -1.95872124 |
| H                                               | 0.22743267  | -0.11469563                                     | -4.94613322           | H                                              | -0.89489995 | -2.21217186 | -1.76379176 |
| H                                               | 0.08059650  | 1.64353315                                      | -4.64780814           | H                                              | 0.66751865  | -1.50444408 | -2.23595467 |
| H                                               | -1.38655628 | 0.62349983                                      | -4.72112994           | H                                              | -0.85618324 | -0.80694594 | -2.84358237 |
| H                                               | -0.26569813 | 0.47793505                                      | -3.33480499           | H                                              | 0.32591873  | 1.12830829  | -1.18410179 |

|                                                                                          |             |             |                 |                                                                                          |             |             |                              |                                                                                         |             |             |                 |
|------------------------------------------------------------------------------------------|-------------|-------------|-----------------|------------------------------------------------------------------------------------------|-------------|-------------|------------------------------|-----------------------------------------------------------------------------------------|-------------|-------------|-----------------|
| <b>RC(S<sub>N</sub>2): Fe<sup>-II</sup>(CO)<sub>4</sub> + CH<sub>4</sub></b>             |             |             | <b>-2215.98</b> | <b>TS(S<sub>N</sub>2): Fe<sup>-II</sup>(CO)<sub>4</sub> + CH<sub>4</sub></b>             |             |             | <b>-2150.98</b><br>(-577.92) | <b>P(S<sub>N</sub>2): Fe<sup>-II</sup>(CO)<sub>4</sub> + CH<sub>4</sub></b>             |             |             | <b>-2157.9</b>  |
| Fe                                                                                       | 0.02909300  | -0.06980300 | 0.35290900      | Fe                                                                                       | -0.11798500 | 0.23002300  | -1.62465600                  | Fe                                                                                      | -0.09130800 | 0.21024500  | -1.48933300     |
| O                                                                                        | 2.32309900  | -1.35374200 | -0.93980700     | O                                                                                        | 2.33858800  | -1.18957500 | -2.33510500                  | O                                                                                       | 2.37809100  | -1.24140700 | -2.05085900     |
| C                                                                                        | 1.38269900  | -0.82254200 | -0.41766900     | C                                                                                        | 1.33617300  | -0.60342200 | -2.09661100                  | C                                                                                       | 1.37981100  | -0.64931000 | -1.85161800     |
| O                                                                                        | 0.18714800  | -0.57491400 | 3.22978300      | O                                                                                        | -0.00193300 | -0.25201200 | 1.23061200                   | O                                                                                       | -0.08033900 | -0.30786900 | 1.36415800      |
| O                                                                                        | -2.47324900 | -1.24676800 | -0.61124800     | O                                                                                        | -2.68210100 | -1.08888900 | -2.11533400                  | O                                                                                       | -2.64939000 | -1.09845200 | -2.00357000     |
| O                                                                                        | 0.05095800  | 2.82676300  | -0.08719000     | O                                                                                        | -0.04819100 | 3.15151200  | -1.50321700                  | O                                                                                       | -0.01034900 | 3.11759800  | -1.24171000     |
| C                                                                                        | 0.04359100  | 1.63947900  | 0.08428300      | C                                                                                        | -0.07875700 | 1.97068600  | -1.60337800                  | C                                                                                       | -0.04260100 | 1.94733600  | -1.36978800     |
| C                                                                                        | -1.44653100 | -0.75999200 | -0.22665500     | C                                                                                        | -1.64048100 | -0.54333000 | -1.96503300                  | C                                                                                       | -1.61535000 | -0.56417400 | -1.82394000     |
| C                                                                                        | 0.12567700  | -0.36537800 | 2.50561400      | C                                                                                        | -0.04923000 | -0.05470900 | 0.06122000                   | C                                                                                       | -0.08474500 | -0.09768400 | 0.20250300      |
| C                                                                                        | -0.17640800 | 0.65121900  | -4.31380500     | C                                                                                        | -0.23482000 | 0.65691000  | -4.15714600                  | C                                                                                       | -0.09790900 | 0.61015800  | -3.66150600     |
| H                                                                                        | 0.63462500  | 0.09617200  | -4.79661500     | H                                                                                        | -0.27702600 | -0.36288900 | -4.50929900                  | H                                                                                       | -0.12987000 | -0.33627100 | -4.19897200     |
| H                                                                                        | -0.05976500 | 1.72032500  | -4.52007200     | H                                                                                        | -0.33532300 | 1.01859700  | -6.29818600                  | H                                                                                       | -0.10953200 | 1.15583900  | -6.61153300     |
| H                                                                                        | -1.13867800 | 0.30685500  | -4.70701000     | H                                                                                        | -1.14660700 | 1.23366200  | -4.19953900                  | H                                                                                       | -0.97371600 | 1.20602700  | -3.91348200     |
| H                                                                                        | -0.14070000 | 0.48184500  | -3.23213800     | H                                                                                        | 0.69481100  | 1.18929100  | -4.29175300                  | H                                                                                       | 0.80653100  | 1.15450600  | -3.92841000     |
| <b>RC(S<sub>N</sub>2): Fe<sup>-II</sup>(CO)<sub>4</sub> + CH<sub>3</sub>Cl</b>           |             |             | <b>-2188.28</b> | <b>TS(S<sub>N</sub>2): Fe<sup>-II</sup>(CO)<sub>4</sub> + CH<sub>3</sub>Cl</b>           |             |             | <b>-2186.46</b><br>(-247.24) | <b>P(S<sub>N</sub>2): Fe<sup>-II</sup>(CO)<sub>4</sub> + CH<sub>3</sub>Cl</b>           |             |             | <b>-2205.75</b> |
| Fe                                                                                       | -0.10969400 | 0.17719700  | -1.30864600     | Fe                                                                                       | -0.10841300 | 0.20201700  | -1.46635300                  | Fe                                                                                      | 0.03474500  | -0.60306800 | 1.53756300      |
| O                                                                                        | 2.22571900  | -1.17021900 | -2.45511400     | O                                                                                        | 2.32388200  | -1.19373500 | -2.30689500                  | O                                                                                       | 2.49520900  | -2.05818400 | 0.95524400      |
| C                                                                                        | 1.26653100  | -0.61002800 | -2.00732800     | C                                                                                        | 1.32744600  | -0.61399300 | -2.01292400                  | C                                                                                       | 1.50062100  | -1.46711400 | 1.17244900      |
| O                                                                                        | 0.03659900  | -0.29212400 | 1.56681000      | O                                                                                        | -0.00286700 | -0.27188800 | 1.39307300                   | O                                                                                       | 0.05594300  | -1.07007600 | 4.40121000      |
| O                                                                                        | -2.63427000 | -1.03935200 | -2.16077200     | O                                                                                        | -2.66006300 | -1.09012800 | -2.09019100                  | O                                                                                       | -2.52250200 | -1.90790900 | 1.01977200      |
| O                                                                                        | -0.06591800 | 3.08695500  | -1.65187400     | O                                                                                        | -0.04965700 | 3.12899400  | -1.49929500                  | O                                                                                       | 0.121171200 | 2.30868300  | 1.69197000      |
| C                                                                                        | -0.08323100 | 1.89519000  | -1.53420900     | C                                                                                        | -0.07508200 | 1.94009800  | -1.53512400                  | C                                                                                       | 0.08696000  | 1.13472600  | 1.61184400      |
| C                                                                                        | -1.59873400 | -0.53325400 | -1.83586500     | C                                                                                        | -1.61857700 | -0.55308400 | -1.88472300                  | C                                                                                       | -1.48903200 | -1.37764100 | 1.21095800      |
| C                                                                                        | -0.02137000 | -0.09789800 | 0.38818200      | C                                                                                        | -0.04492700 | -0.07723700 | 0.22003800                   | C                                                                                       | 0.04764600  | -0.88086600 | 3.23627800      |
| C                                                                                        | -0.26217100 | 0.82895500  | -5.16028800     | C                                                                                        | -0.25101000 | 0.71934100  | -4.49599000                  | C                                                                                       | 0.01639200  | -0.24133800 | -0.63738900     |
| H                                                                                        | 0.63236600  | 0.24330400  | -4.95901900     | H                                                                                        | -0.26930300 | -0.36075700 | -4.50258100                  | Cl                                                                                      | -0.01108200 | 0.24866100  | -3.59718200     |
| Cl                                                                                       | -0.33268000 | 1.15013000  | -6.97347700     | Cl                                                                                       | -0.35363700 | 1.08526300  | -6.65014700                  | H                                                                                       | 0.92247800  | 0.29463700  | -0.90338000     |
| H                                                                                        | -1.15882100 | 0.27864900  | -4.88260200     | H                                                                                        | -1.15192300 | 1.23138900  | -4.19075800                  | H                                                                                       | -0.86107800 | 0.35066100  | -0.87941400     |
| H                                                                                        | -0.22178000 | 1.78957400  | -4.65113200     | H                                                                                        | 0.69238800  | 1.20068400  | -4.28277000                  | H                                                                                       | -0.02061400 | -1.20127300 | -1.14352800     |
| <b>RC(S<sub>N</sub>2): Fe<sup>-II</sup>(CO)<sub>4</sub> + C<sub>2</sub>H<sub>6</sub></b> |             |             | <b>-2596.31</b> | <b>TS(S<sub>N</sub>2): Fe<sup>-II</sup>(CO)<sub>4</sub> + C<sub>2</sub>H<sub>6</sub></b> |             |             | <b>-2532.42</b><br>(-313.36) | <b>P(S<sub>N</sub>2): Fe<sup>-II</sup>(CO)<sub>4</sub> + C<sub>2</sub>H<sub>6</sub></b> |             |             | <b>-2534.49</b> |
| Fe                                                                                       | -0.01239400 | -0.06893600 | 0.32298200      | Fe                                                                                       | -0.11344800 | 0.21830000  | -1.56415800                  | Fe                                                                                      | -0.11396900 | 0.21695500  | -1.54842000     |
| O                                                                                        | 2.24975400  | -1.22773800 | -1.13183500     | O                                                                                        | 2.35169200  | -1.18082300 | -2.28601800                  | O                                                                                       | 2.35939600  | -1.19727000 | -2.19629500     |
| C                                                                                        | 1.32107200  | -0.75388200 | -0.53793600     | C                                                                                        | 1.34582000  | -0.60380400 | -2.03837100                  | C                                                                                       | 1.35497000  | -0.61810700 | -1.97144000     |
| O                                                                                        | 0.37451700  | -0.49982400 | 3.19152100      | O                                                                                        | -0.00605100 | -0.25308000 | 1.29388100                   | O                                                                                       | 0.00102100  | -0.25943200 | 1.30928800      |
| O                                                                                        | -2.51044600 | -1.37169900 | -0.47805200     | O                                                                                        | -2.66419500 | -1.11494500 | -2.08518600                  | O                                                                                       | -2.66759200 | -1.13349600 | -1.98639700     |
| O                                                                                        | -0.14384800 | 2.81320800  | -0.17848400     | O                                                                                        | -0.06230600 | 3.14148900  | -1.47723900                  | O                                                                                       | -0.06186300 | 3.13290300  | -1.37060300     |
| C                                                                                        | -0.09261700 | 1.63138500  | 0.02303200      | C                                                                                        | -0.08527800 | 1.95875600  | -1.55812400                  | C                                                                                       | -0.08475600 | 1.95718600  | -1.48004100     |
| C                                                                                        | -1.48699900 | -0.83526000 | -0.15627200     | C                                                                                        | -1.62751300 | -0.56445400 | -1.91762900                  | C                                                                                       | -1.63431000 | -0.57964600 | -1.84445900     |
| C                                                                                        | 0.21683700  | -0.32436900 | 2.01589400      | C                                                                                        | -0.04950900 | -0.06050600 | 0.12351600                   | C                                                                                       | -0.04551800 | -0.06565300 | 0.14307200      |
| C                                                                                        | -0.33065100 | 0.81213300  | -4.25873200     | C                                                                                        | -0.23147400 | 0.64408000  | -4.10165600                  | C                                                                                       | -0.21766200 | 0.59830600  | -3.82175300     |
| H                                                                                        | -0.18928700 | -0.05446700 | -4.91906000     | H                                                                                        | -0.26694400 | -0.37742500 | -4.44884100                  | H                                                                                       | -0.25525400 | -0.37205500 | -4.30792500     |
| C                                                                                        | 0.81691600  | 1.80056000  | -4.38264400     | C                                                                                        | -0.37190700 | 1.09111800  | -6.74210800                  | C                                                                                       | -0.39120700 | 1.08870500  | -6.77640000     |
| H                                                                                        | -1.29101100 | 1.27669800  | -4.52044500     | H                                                                                        | -1.14691900 | 1.21465100  | -4.14037800                  | H                                                                                       | -1.11743100 | 1.17652100  | -4.00964700     |
| H                                                                                        | -0.40864300 | 0.44286900  | -3.22945200     | H                                                                                        | 0.69552500  | 1.18161400  | -4.23247400                  | H                                                                                       | 0.67768100  | 1.14923700  | -4.09451800     |
| H                                                                                        | 1.76655100  | 1.32675400  | -4.10786900     | H                                                                                        | 0.48448100  | 0.60346000  | -7.23889000                  | H                                                                                       | 0.44117700  | 0.61776700  | -7.34144000     |
| H                                                                                        | 0.67683300  | 2.64256700  | -3.69557400     | H                                                                                        | -0.34412800 | 2.18046900  | -6.91688900                  | H                                                                                       | -0.38692900 | 2.17502600  | -7.00803100     |
| H                                                                                        | 0.91853300  | 2.20194500  | -5.40272800     | H                                                                                        | -1.32041800 | 0.66944200  | -7.11693000                  | H                                                                                       | -1.34350300 | 0.66430700  | -7.15874400     |
| <b>CH<sub>4</sub></b>                                                                    |             |             | <b>-554.09</b>  | <b>CH<sub>3</sub>Cl</b>                                                                  |             |             | <b>-516.57</b>               | <b>C<sub>2</sub>H<sub>6</sub></b>                                                       |             |             | <b>-933.49</b>  |
| C                                                                                        | 0.00000000  | 0.00000000  | 0.00000000      | C                                                                                        | 0.00000000  | 0.00000000  | -2.00508000                  | C                                                                                       | 0.00000000  | 0.00000000  | -0.76004500     |
| H                                                                                        | 0.63276400  | -0.63276400 | 0.63276400      | Cl                                                                                       | 0.00000000  | 0.00000000  | -0.23687800                  | C                                                                                       | 0.00000000  | 0.00000000  | 0.76004500      |
| H                                                                                        | -0.63276400 | -0.63276400 | -0.63276400     | H                                                                                        | -0.51699900 | -0.89546800 | -2.35691600                  | H                                                                                       | -0.00001600 | -1.02019200 | -1.16239400     |
| H                                                                                        | -0.63276400 | 0.63276400  | 0.63276400      | H                                                                                        | -0.51699900 | 0.89546800  | -2.35691600                  | H                                                                                       | -0.88350400 | 0.51011000  | -1.16239400     |
| H                                                                                        | 0.63276400  | 0.63276400  | -0.63276400     | H                                                                                        | 1.03399700  | 0.00000000  | -2.35691600                  | H                                                                                       | 0.88352000  | -0.51008200 | -1.16239400     |
|                                                                                          |             |             |                 |                                                                                          |             |             |                              | H                                                                                       | 0.88352000  | -0.51008200 | 1.16239400      |
|                                                                                          |             |             |                 |                                                                                          |             |             |                              | H                                                                                       | -0.88350400 | -0.51011000 | 1.16239400      |
|                                                                                          |             |             |                 |                                                                                          |             |             |                              | H                                                                                       | -0.00001600 | 1.02019200  | 1.16239400      |
| <b>Pd(CO)<sub>2</sub></b>                                                                |             |             | <b>-775.51</b>  | <b>Pd(PH<sub>3</sub>)<sub>2</sub></b>                                                    |             |             | <b>-785.19</b>               | <b><sup>1</sup>Fe(CO)<sub>4</sub></b>                                                   |             |             | <b>-1655.71</b> |
| Pd                                                                                       | 0.00000000  | 0.00000000  | -0.99564909     | Pd                                                                                       | 0.00000000  | 0.00000000  | 0.00000000                   | Fe                                                                                      | 0.00000000  | 0.00000000  | 0.00264800      |
| C                                                                                        | 1.81458968  | 0.00000000  | -0.41703934     | H                                                                                        | 0.66596013  | 1.01127603  | 2.98138684                   | O                                                                                       | -2.92700731 | 0.00000000  | 0.08271546      |
| C                                                                                        | -1.81458968 | 0.00000000  | -0.41703934     | H                                                                                        | 0.66596013  | -1.01127603 | -2.98138684                  | C                                                                                       | -1.77694389 | 0.00000000  | 0.02975038      |
| O                                                                                        | 2.84077579  | 0.00000000  | 0.09746426      | P                                                                                        | 0.00000000  | 0.00000000  | -2.23097113                  | O                                                                                       | 0.00000000  | 2.48259819  | 1.46467953      |
| O                                                                                        | -2.84077579 | 0.00000000  | 0.09746426      | H                                                                                        | -1.20877080 | -0.07110037 | -2.98138684                  | O                                                                                       | 2.92700731  | 0.00000000  | 0.08271546      |
|                                                                                          |             |             |                 | H                                                                                        | 0.54281067  | 1.08237640  | -2.98138684                  | O                                                                                       | 0.00000000  | -2.48259819 | 1.46467953      |
|                                                                                          |             |             |                 | P                                                                                        | 0.00000000  | 0.00000000  | 2.23097113                   | C                                                                                       | 0.00000000  | -1.54757822 | 0.78082679      |
|                                                                                          |             |             |                 | H                                                                                        | -1.20877080 | 0.07110037  | 2.98138684                   | C                                                                                       | 1.77694389  | 0.00000000  | 0.02975038      |
|                                                                                          |             |             |                 | H                                                                                        | 0.54281067  | -1.08237640 | 2.98138684                   | C                                                                                       | 0.00000000  | 1.54757822  | 0.78082679      |



|                              |             |             |             |                                      |             |             |             |                            |             |             |             |
|------------------------------|-------------|-------------|-------------|--------------------------------------|-------------|-------------|-------------|----------------------------|-------------|-------------|-------------|
| ${}^3\text{Fe}(\text{CO})_4$ |             |             | -1655.73    | $\text{Fe}^{\text{II}}(\text{CO})_4$ |             |             | -1659.49    | $\text{Fe}(\text{PH}_3)_4$ |             |             | -1636.72    |
| Fe                           | 0.00000000  | 0.00000000  | 0.03357252  | Fe                                   | 0.00000000  | 0.00000000  | 0.41153541  | Fe                         | -0.14723100 | 0.33717600  | 0.27365000  |
| O                            | -2.90411507 | 0.00000000  | -0.53617704 | O                                    | -2.38251414 | 0.00000000  | -1.28917807 | P                          | -1.62410600 | -0.92102100 | 0.98472200  |
| C                            | -1.76533556 | 0.00000000  | -0.36612355 | C                                    | -1.40641172 | 0.00000000  | -0.59007386 | P                          | 1.09114200  | 0.13744700  | -1.37373300 |
| O                            | 0.00000000  | 2.14900907  | 2.00272278  | O                                    | 0.00000000  | 2.38249942  | 2.11227250  | H                          | -1.85757900 | -2.15943800 | 0.29884100  |
| O                            | 2.90411507  | 0.00000000  | -0.53617704 | O                                    | 2.38251414  | 0.00000000  | -1.28917807 | P                          | -1.55659700 | 1.49536800  | -0.78076900 |
| O                            | 0.00000000  | -2.14900907 | 2.00272278  | O                                    | 0.00000000  | -2.38249942 | 2.11227250  | H                          | -2.97372100 | 1.33644600  | -0.66771600 |
| C                            | 0.00000000  | -1.30861404 | 1.21243264  | C                                    | 0.00000000  | -1.40640662 | 1.41315507  | H                          | -3.01840300 | -0.58808600 | 1.04442100  |
| C                            | 1.76533556  | 0.00000000  | -0.36612355 | C                                    | 1.40641172  | 0.00000000  | -0.59007386 | H                          | 1.92169900  | 0.46503800  | 2.43841000  |
| C                            | 0.00000000  | 1.30861404  | 1.21243264  | C                                    | 0.00000000  | 1.40640662  | 1.41315507  | P                          | 1.27258900  | -0.49179200 | 1.59097100  |
|                              |             |             |             |                                      |             |             |             | H                          | 0.95811300  | -1.41593900 | 2.63684700  |
|                              |             |             |             |                                      |             |             |             | H                          | 2.47293000  | -1.16044800 | 1.19873600  |
|                              |             |             |             |                                      |             |             |             | H                          | -1.61640900 | -1.54152600 | 2.27921200  |
|                              |             |             |             |                                      |             |             |             | H                          | 2.10476800  | 1.07171900  | -1.80596700 |
|                              |             |             |             |                                      |             |             |             | H                          | 1.97717400  | -0.97670900 | -1.49676300 |
|                              |             |             |             |                                      |             |             |             | H                          | 0.54845500  | 0.02133400  | -2.69019000 |
|                              |             |             |             |                                      |             |             |             | H                          | -1.54253900 | 2.89053900  | -0.45185900 |
|                              |             |             |             |                                      |             |             |             | H                          | -1.57153100 | 1.69212800  | -2.19621600 |
|                              |             |             |             |                                      |             |             |             |                            |             |             |             |
| $\text{MgClCH}_3$            |             |             | -566.84     | $\text{MgCl}_2$                      |             |             | -201.89     |                            |             |             |             |
| C                            | 0.00000000  | 0.00000000  | 1.59904100  | Cl                                   | -2.17781600 | 0.00000000  | -5.36323700 |                            |             |             |             |
| H                            | 0.50919900  | 0.88195900  | 1.18772500  | Mg                                   | 0.00000000  | 0.00000000  | -5.35707500 |                            |             |             |             |
| H                            | -1.01839800 | 0.00000000  | 1.18772500  | Cl                                   | 2.17781600  | 0.00000000  | -5.36323700 |                            |             |             |             |
| H                            | 0.50919900  | -0.88195900 | 1.18772500  |                                      |             |             |             |                            |             |             |             |
| Mg                           | 0.00000000  | 0.00000000  | 3.67342100  |                                      |             |             |             |                            |             |             |             |
| Cl                           | 0.00000000  | 0.00000000  | 5.87635300  |                                      |             |             |             |                            |             |             |             |
